# Supplementary material for: Comparative DNA methylome analysis of estrus ewes reveals the complex regulatory pathways of sheep fecundity
Source: Reprod Biol Endocrinol. 2020 Aug 4;18:77. doi: 10.1186/s12958-020-00633-9 (PMC7401212; doi:10.1186/s12958-020-00633-9)
Supplement: Supplementary file 2 — Additional file 2. [file 12958_2020_633_MOESM2_ESM.xls]

## Sheet: Dif_Gene_HanBBvsDorset_1.5FC_FD
GeneID	HanBB	Dorset	FoldChange	Log2FC	P-Value	FDR	Style	W4	W1	W2	D6	D5	D4	AccID	Symbol	KeggID	Description	E-Value	Blast_AccID	Blast_Symbol	Blast_Description
HSPBAP1	370.466	201.062	1.84255	0.881702	2.9842e-31	6.43573e-27	up	342	491	304	195	290	133	XP_004003028.1	HSPBAP1		HSPB (heat shock 27kDa) associated protein 1	0	NM_024610.5	HSPBAP1	cDNA FLJ76988, highly similar to Homo sapiens HSPB (heat shock 27kDa) associated protein 1 (HSPBAP1), mRNA
PLA2G4B	55.0797	128.219	0.429574	-1.21902	2.04725e-19	2.20755e-15	down	57	54	52	132	177	84	XP_004010521.1	PLA2G4B		phospholipase A2, group IVB (cytosolic)	0	NM_001114633.1	PLA2G4B	Cytosolic phospholipase A2 beta
EME2	65.1279	173.395	0.375604	-1.41272	1.19024e-17	6.41718e-14	down	53	90	58	166	267	108	XP_004021157.1	EME2		essential meiotic endonuclease 1 homolog 2 (S. pombe)	8e-90	NM_001257370.1	EME2	Probable crossover junction endonuclease EME2
PLEKHB1	442.5	151.384	2.92303	1.54747	2.69419e-17	1.16206e-13	up	380	668	336	207	113	114	XP_004016354.1	PLEKHB1		pleckstrin homology domain containing, family B (evectins) member 1	2e-129	NM_021200.2	PLEKHB1	Pleckstrin homology domain-containing family B member 1
RHOB	315.29	578.182	0.545312	-0.874845	5.23146e-15	1.74963e-11	down	284	360	305	634	791	359	NM_001127673.1	RHOB		RhoB	1e-113	NM_004040.2	RHOB	Rho-related GTP-binding protein RhoB
MYH7B	31.2898	75.8614	0.41246	-1.27767	6.68764e-15	1.80282e-11	down	30	32	31	75	108	50	XP_004014866.1	MYH7B		myosin, heavy chain 7B, cardiac muscle, beta	0	NM_020884.3	MYH7B	Myosin-7B
DNAJB1	487.215	989.509	0.492381	-1.02215	2.17054e-14	5.2011e-11	down	403	615	467	1151	1396	555	XP_004008518.1	DNAJB1		DnaJ (Hsp40) homolog, subfamily B, member 1	0	NM_006145.1	DNAJB1	DnaJ homolog subfamily B member 1
CLEC4E	99.7378	11.6733	8.54409	3.09493	6.22016e-14	1.34144e-10	up	113	97	85	10	1	16	XP_004007622.1	CLEC4E		Macrophage C-type lectin Mincle-like protein	8e-96	NM_014358.2	CLEC4E	C-type lectin domain family 4 member E
TTC26	146.942	81.2695	1.80809	0.854465	1.60532e-13	3.14731e-10	up	133	198	121	97	117	43	XP_004008150.1	TTC26		tetratricopeptide repeat domain 26	0	NM_024926.3	TTC26	Tetratricopeptide repeat protein 26
XLOC_028961	0.515264	25.7297	0.020026	-5.64198	1.95039e-13	3.38479e-10	down	0	2	0	22	43	16	XLOC_028961	XLOC_028961
TRNAV-AAC.9	16.8795	0	Inf	20	2.04035e-13	3.38479e-10	up	11	20	20	0	0	0	TRNAV-AAC	TRNAV-AAC		transfer RNA valine (anticodon AAC)
MOV10	346.106	545.538	0.634431	-0.656466	8.28434e-13	1.27614e-09	down	326	436	293	552	783	349	XP_004002382.1	MOV10		Mov10, Moloney leukemia virus 10, homolog (mouse)	0	NM_020963.4	MOV10	cDNA FLJ32791 fis, clone TESTI2002365, highly similar to helicase MOV-10 (EC 3.6.1.-)
MTSS1L	420.03	953.698	0.440422	-1.18304	3.39109e-12	4.87549e-09	down	349	517	410	1003	1486	532	XP_004015520.1	MTSS1L		metastasis suppressor 1-like	2e-158	NM_138383.2	MTSS1L	MTSS1-like protein
ADAM22	79.8461	213.544	0.373909	-1.41924	7.57731e-12	1.02133e-08	down	81	121	48	243	278	134	XP_004008305.1	ADAM22		ADAM metallopeptidase domain 22	0	NM_021723.3	ADAM22	cDNA FLJ43443 fis, clone OCBBF2031167, highly similar to ADAM 22 (A disintegrin and metalloproteinase domain 22)
TRNAD-GUC.7	246.689	14.8521	16.6097	4.05396	1.06975e-11	1.35707e-08	up	94	371	305	3	27	14	TRNAD-GUC	TRNAD-GUC		transfer RNA aspartic acid (anticodon GUC)
DDX49	312.164	473.18	0.659715	-0.600086	1.3192e-11	1.58055e-08	down	258	458	256	508	667	291	XP_004008461.1	DDX49		DEAD (Asp-Glu-Ala-Asp) box polypeptide 49	0	NM_019070.4	DDX49	cDNA FLJ77346, highly similar to Homo sapiens DEAD (Asp-Glu-Ala-Asp) box polypeptide 49 (DDX49), mRNA
ROPN1L	160.142	54.8699	2.91858	1.54527	1.48355e-11	1.6839e-08	up	127	230	140	73	59	34	XP_004017133.1	ROPN1L		rhophilin associated tail protein 1-like	2e-112	NM_031916.4	ROPN1L	Ropporin-1-like protein
CER1	26.297	3.2581	8.07126	3.01279	2.64593e-11	2.8531e-08	up	20	39	23	3	1	4	XP_004005360.1	CER1		cerberus 1, cysteine knot superfamily, homolog (Xenopus laevis)	4e-101	NM_005454.2	CER1	Cerberus 1, cysteine knot superfamily, homolog (Xenopus laevis)
CLIP2	566.705	1112.75	0.509282	-0.973463	4.67084e-11	4.79673e-08	down	470	730	532	1060	1733	687	XP_004021293.1	CLIP2		CAP-GLY domain containing linker protein 2	0	NM_032421.2	CLIP2	Cytoplasmic linker 2
PLA2G16	584.512	357.019	1.6372	0.711232	6.33148e-11	6.20658e-08	up	468	749	568	393	452	238	XP_004019681.1	PLA2G16		phospholipase A2, group XVI	2e-78	NM_007069.3	PLA2G16	HRAS-like suppressor 3
KRT222	10.0958	74.4991	0.135515	-2.88347	7.64008e-11	7.16374e-08	down	20	10	0	76	116	43	XP_004013431.1	KRT222		keratin 222	6e-96	NM_152349.2	KRT222	Keratin-like protein KRT222
LOC101122601	2841.83	1641.84	1.73089	0.791511	8.36317e-11	7.515e-08	up	2241	4024	2536	1939	2000	1053	LOC101122601	LOC101122601		ribosomal protein S13 pseudogene
CCDC159	32.254	71.3852	0.451831	-1.14615	1.46516e-10	1.2153e-07	down	26	46	28	70	94	51	XP_004009353.1	CCDC159		coiled-coil domain containing 159	2e-125	NM_001080503.2	CCDC159	coiled-coil domain containing 159
PIWIL2	9.64694	41.2163	0.234057	-2.09507	3.54798e-10	2.7327e-07	down	13	17	1	45	60	24	XP_004004245.1	PIWIL2		piwi-like 2 (Drosophila)	0	NM_018068.3	PIWIL2	Piwi-like protein 2
ADAT2	78.6397	38.6061	2.03698	1.02643	4.1455e-10	3.08282e-07	up	73	100	67	38	54	26	XP_004011436.1	ADAT2		adenosine deaminase, tRNA-specific 2	4e-97	NM_182503.2	ADAT2	tRNA-specific adenosine deaminase 2
CDC25B	692.36	431.816	1.60337	0.681103	7.83936e-10	5.63545e-07	up	533	949	652	441	520	321	XP_004014413.1	CDC25B		cell division cycle 25 homolog B (S. pombe)	0	NM_212530.1	CDC25B	Isoform CDC25B6
NCK2	435.411	677.831	0.642359	-0.638549	1.51591e-09	1.02163e-06	down	382	586	371	736	987	397	XP_004005965.1	NCK2		NCK adaptor protein 2	0	NM_003581.4	NCK2	Cytoplasmic protein NCK2
PELP1	226.567	528.495	0.428702	-1.22195	2.53356e-09	1.65572e-06	down	245	295	154	543	816	306	XP_004023598.1	PELP1		proline, glutamate and leucine rich protein 1	0	NM_014389.2	PELP1	Proline-, glutamic acid- and leucine-rich protein 1
LOC101103296	92.6461	46.2287	2.00408	1.00294	3.38505e-09	2.08577e-06	up	84	128	74	65	53	25	XP_004022285.1	LOC101103296		GRB2-associated-binding protein 3-like	3e-97	NM_080612.3	GAB3	GRB2-associated-binding protein 3
CPT1B	256.28	98.0766	2.61306	1.38574	3.65192e-09	2.18771e-06	up	180	433	203	100	116	74	NM_001009259.1	CPT1B		Carnitine palmitoyltransferase I	0	NM_152247.1	CPT1B	CPT1B protein
TRNAK-UUU.12	24.1899	0	Inf	20	3.93686e-09	2.29466e-06	up	29	28	16	0	0	0	TRNAK-UUU	TRNAK-UUU		transfer RNA lysine (anticodon UUU)
XLOC_029260	40.5047	10.7199	3.77846	1.9178	5.49349e-09	3.1177e-06	up	39	62	26	17	20	1	XLOC_029260	XLOC_029260
FMNL1	462.74	247.532	1.86942	0.902587	6.10412e-09	3.37542e-06	up	417	641	371	185	333	208	XP_004013470.1	FMNL1		formin-like 1	0	NM_052905.3	FMNL2	cDNA FLJ37546 fis, clone BRCAN2027364, highly similar to Homo sapiens formin-like 2 (FMNL2), transcript variant 2, mRNA
C1H1orf192	141.258	68.5354	2.0611	1.04342	1.38981e-08	7.31038e-06	up	115	186	132	71	60	61	XP_004002749.1	C1H1orf192		chromosome 1 open reading frame, human C1orf192	2e-85	NM_001013625.3	C1orf192	chromosome 1 open reading frame 192
MILR1	220.85	99.2609	2.22494	1.15377	2.81686e-08	1.44639e-05	up	221	271	179	97	95	88	XP_004013079.1	MILR1		mast cell immunoglobulin-like receptor 1	5e-111	NM_001085423.1	MILR1	Allergin-1
ZDHHC7	135.159	341.575	0.395695	-1.33754	3.88081e-08	1.90213e-05	down	142	229	60	320	492	233	NM_001163604.1	ZDHHC7		Palmitoyltransferase	1e-170	NM_017740.2	ZDHHC7	Palmitoyltransferase ZDHHC7
RAB11FIP3	318.719	625.77	0.509323	-0.973347	4.61397e-08	2.16315e-05	down	293	425	261	672	964	346	XP_004021128.1	RAB11FIP3		RAB11 family interacting protein 3 (class II)	0	NM_014700.3	RAB11FIP3	Rab11 family-interacting protein 3
LOC101123268	82.5824	22.4897	3.67201	1.87657	4.85071e-08	2.22575e-05	up	66	99	85	26	29	14	XP_004004273.1	LOC101123268		dolichyl-diphosphooligosaccharide--protein glycosyltransferase subunit 1-like	0	NM_002950.3	RPN1	cDNA FLJ51740, highly similar to Dolichyl-diphosphooligosaccharide--proteinglycosyltransferase 67 kDa subunit (EC 2.4.1.119)
XLOC_041882	26.2623	7.5531	3.47702	1.79785	6.23742e-08	2.80242e-05	up	22	33	25	9	13	3	XLOC_041882	XLOC_041882
FBXL4	269.582	142.83	1.88744	0.91643	7.05706e-08	3.07539e-05	up	242	375	216	179	158	93	XP_004011306.1	FBXL4		F-box and leucine-rich repeat protein 4	0	NM_012160.4	FBXL4	F-box/LRR-repeat protein 4
BAI3	96.9701	385.287	0.251683	-1.99032	7.13018e-08	3.07539e-05	down	60	59	156	425	609	199	XP_004011629.1	BAI3		brain-specific angiogenesis inhibitor 3	0	NM_001704.2	BAI3	cDNA FLJ75576, highly similar to Homo sapiens brain-specific angiogenesis inhibitor 3 (BAI3), mRNA
SKOR1	20.2878	71.4763	0.28384	-1.81685	7.85622e-08	3.3221e-05	down	17	23	21	93	78	45	XP_004010925.1	SKOR1		SKI family transcriptional corepressor 1	9e-137	NM_001258024.1	SKOR1	SKI family transcriptional corepressor 1
HOXB5	7.44718	24.4785	0.304233	-1.71675	9.35615e-08	3.78787e-05	down	10	4	7	31	35	12	XP_004012854.1	HOXB5		Homeobox protein Hox-B5	5e-157	NM_002147.3	HOXB5	Homeobox protein Hox-B5
BST1	8.37314	76.0486	0.110102	-3.18308	9.39761e-08	3.78787e-05	down	9	12	5	96	78	52	XP_004010174.1	BST1		bone marrow stromal cell antigen 1	2e-95	NM_004334.2	BST1	ADP-ribosyl cyclase 2
MKX	773.733	1238.72	0.624625	-0.678938	9.4846e-08	3.78787e-05	down	647	960	746	1234	1594	891	XP_004014738.1	MKX		mohawk homeobox	0	NM_173576.2	MKX	Homeobox protein Mohawk
LOC101123097	234.348	802.001	0.292204	-1.77495	1.14579e-07	4.49275e-05	down	300	214	175	746	976	635	LOC101123097	LOC101123097		cold shock domain containing E1, RNA-binding pseudogene
RNF13	1313.37	828.852	1.58457	0.664087	1.18842e-07	4.57668e-05	up	1200	1729	1098	987	952	554	XP_004003310.1	RNF13		ring finger protein 13	0	NM_183384.2	RNF13	Ring finger protein 13, isoform CRA_a
LRRIQ3	132.642	67.3114	1.97057	0.978612	1.26852e-07	4.76384e-05	up	113	154	133	62	96	47	XP_004002132.1	LRRIQ3		leucine-rich repeats and IQ motif containing 3	0	NM_145258.1	LRRIQ3	leucine-rich repeats and IQ motif containing 3
LOC101118374	48.3046	16.4468	2.93702	1.55435	1.2812e-07	4.76384e-05	up	34	76	42	26	15	9	LOC101118374	LOC101118374		ribosomal protein L9 pseudogene
FAM154B	102.144	35.514	2.87616	1.52414	1.438e-07	5.0179e-05	up	104	118	86	52	47	15	XP_004018119.1	FAM154B		family with sequence similarity 154, member B	3e-176	NM_001008226.1	FAM154B	family with sequence similarity 154, member B
DUSP27	53.7227	151.144	0.35544	-1.49232	1.44259e-07	5.0179e-05	down	57	34	62	157	190	107	XP_004003783.1	DUSP27		dual specificity phosphatase 27 (putative)	2e-164	NM_001080426.1	DUSP27	Inactive dual specificity phosphatase 27
C18H15orf26	234.054	62.2911	3.75743	1.90975	1.56075e-07	5.34272e-05	up	201	238	256	115	34	35	XP_004017845.1	C18H15orf26		chromosome 18 open reading frame, human C15orf26	8e-111	NM_173528.2	C15orf26	chromosome 15 open reading frame 26
MYH15	19.2675	50.077	0.384757	-1.37798	1.81913e-07	6.1299e-05	down	18	22	18	45	77	33	XP_004003825.1	MYH15		myosin, heavy chain 15	0	NM_014981.1	MYH15	cDNA FLJ30874 fis, clone FEBRA2004329, moderately similar to MYOSIN HEAVY CHAIN, CARDIAC MUSCLE ISOFORM
MGST1	590.883	226.278	2.61132	1.38478	1.85707e-07	6.13587e-05	up	483	936	443	282	179	182	XP_004006867.1	MGST1		microsomal glutathione S-transferase 1	3e-80	NM_145792.2	MGST1	Microsomal glutathione S-transferase 1
CD34	1346.64	2048.76	0.657293	-0.60539	1.93471e-07	6.13587e-05	down	1063	1538	1451	2180	2847	1291	XP_004014166.1	CD34		CD34 molecule	7e-109	NM_001773.2	CD34	cDNA FLJ75215, highly similar to CD34=glycoprotein expressed in lymphohematopoietic progenitor cells
ATXN7L3	532.31	880.271	0.604712	-0.725681	2.26571e-07	7.0815e-05	down	362	760	528	885	1309	545	XP_004013028.1	ATXN7L3		ataxin 7-like 3	0	NM_020218.1	ATXN7L3	Ataxin-7-like protein 3
LSS	184.107	335.122	0.549375	-0.864137	2.42272e-07	7.35893e-05	down	143	254	171	309	486	230	XP_004003980.1	LSS		lanosterol synthase (2,3-oxidosqualene-lanosterol cyclase)	0	NM_002340.5	LSS	cDNA, FLJ92849, highly similar to Homo sapiens lanosterol synthase (2,3-oxidosqualene-lanosterol cyclase) (LSS), mRNA
SV2A	36.6933	122.859	0.298661	-1.74342	2.56989e-07	7.69754e-05	down	39	31	37	109	161	95	XP_004002484.1	SV2A		synaptic vesicle glycoprotein 2A	0	NM_014849.4	SV2A	cDNA FLJ75880, highly similar to Homo sapiens synaptic vesicle glycoprotein 2A (SV2A), mRNA
LOC101107743	1558.28	17.3986	89.5636	6.48484	4.23446e-07	0.00012176	up	873	2569	1497	42	5	6	LOC101107743	LOC101107743		ribosomal protein L23 pseudogene
PLB1	25.8246	87.2778	0.29589	-1.75687	4.60077e-07	0.000125737	down	19	18	37	60	148	62	XP_004007287.1	PLB1		phospholipase B1	0	NM_153021.4	PLB1	Phospholipase B1, membrane-associated
KCTD11	132.475	235.51	0.562502	-0.83007	4.63014e-07	0.000125737	down	107	168	129	239	347	146	XP_004012695.1	KCTD11		potassium channel tetramerisation domain containing 11	3e-119	NM_001002914.2	KCTD11	BTB/POZ domain-containing protein KCTD11
IRGQ.1	150.595	322.492	0.466972	-1.09859	4.70758e-07	0.000125737	down	128	218	122	281	525	204	XP_004023452.1	IRGQ		immunity-related GTPase family, Q	5e-146	NM_001007561.2	IRGQ	immunity-related GTPase family, Q
C1H1orf109	106.905	69.0243	1.5488	0.631147	4.72217e-07	0.000125737	up	85	148	97	75	95	43	XP_004001860.1	C1H1orf109		chromosome 1 open reading frame, human C1orf109	3e-99	NM_017850.1	C1orf109	chromosome 1 open reading frame 109
PPP1R15A	926.006	2098.98	0.441171	-1.18059	4.72256e-07	0.000125737	down	760	1339	778	1753	3136	1506	XP_004015408.1	PPP1R15A		protein phosphatase 1, regulatory subunit 15A	5e-102	NM_014330.3	PPP1R15A	Protein phosphatase 1 regulatory subunit 15A
SCARA5	225.46	405.306	0.556271	-0.846139	4.99166e-07	0.000131281	down	177	359	175	437	597	236	XP_004004485.1	SCARA5		scavenger receptor class A, member 5 (putative)	0	NM_173833.5	SCARA5	cDNA FLJ57441, highly similar to Homo sapiens scavenger receptor class A, member 5 (SCARA5), mRNA
SGPL1	904.33	441.247	2.04949	1.03526	5.31824e-07	0.000138185	up	882	1012	822	676	327	290	XP_004021486.1	SGPL1		sphingosine-1-phosphate lyase 1	0	NM_003901.3	SGPL1	Sphingosine-1-phosphate lyase 1
NAB2	1136.64	1979.42	0.574229	-0.800301	5.8688e-07	0.000150674	down	969	1333	1130	2350	2530	1206	XP_004007508.1	NAB2		NGFI-A binding protein 2 (EGR1 binding protein 2)	0	NM_005967.3	NAB2	NGFI-A-binding protein 2
PLEKHG5	175.796	315.001	0.558078	-0.84146	6.39913e-07	0.000162357	down	135	201	193	308	471	199	XP_004023730.1	PLEKHG5		pleckstrin homology domain containing, family G (with RhoGef domain) member 5	0	NM_198681.3	PLEKHG5	cDNA FLJ33882 fis, clone CTONG2007175, highly similar to Homo sapiens pleckstrin homology domain containing, family G (with RhoGef domain) member 5, transcript variant 1, mRNA
RARRES1	21098.2	6890.96	3.06172	1.61434	7.17141e-07	0.000177768	up	20269	26238	17699	6649	4123	7329	XP_004003262.1	RARRES1		retinoic acid receptor responder (tazarotene induced) 1	5e-109	NM_206963.1	RARRES1	Retinoic acid receptor responder protein 1
XLOC_042324	31.7186	1.55344	20.4183	4.35179	8.08995e-07	0.000198259	up	13	57	32	5	0	0	XLOC_042324	XLOC_042324
TFF3	74.2584	11.5987	6.4023	2.67859	8.81187e-07	0.000211152	up	17	94	115	17	13	6	XP_004003410.1	TFF3		trefoil factor 3 (intestinal)	4e-28	NM_003226.3	TFF3	Trefoil factor 3
XLOC_008930	19.7929	3.59869	5.50004	2.45944	1.07399e-06	0.000254523	up	19	27	15	10	2	0	XLOC_008930	XLOC_008930
ABCA9	857.633	399.7	2.14569	1.10144	1.18964e-06	0.000278866	up	855	1209	592	458	609	207	XP_004013200.1	ABCA9		ATP-binding cassette, sub-family A (ABC1), member 9	0	NM_172386.1	ABCA9	ATP-binding cassette sub-family A member 9
LRCOL1	72.3568	17.5932	4.11277	2.04011	1.26604e-06	0.000293585	up	63	74	78	17	12	18	XP_004017598.1	LRCOL1		leucine rich colipase-like 1	1e-39	NM_001195520.1	LRCOL1	leucine rich colipase-like 1
ENOX1	331.833	207.341	1.60042	0.678454	1.31489e-06	0.00030167	up	306	398	301	259	296	104	XP_004012304.1	ENOX1		ecto-NOX disulfide-thiol exchanger 1	0	NM_017993.3	ENOX1	Ecto-NOX disulfide-thiol exchanger 1
KIAA0825	257.279	123.63	2.08104	1.0573	1.44877e-06	0.000328885	up	231	277	261	155	161	69	XP_004009130.1	KIAA0825		KIAA0825 ortholog	7e-160	NM_173665.2	KIAA0825	KIAA0825
LZTS2	597.561	1044.32	0.572202	-0.805403	1.49683e-06	0.000336257	down	497	803	537	1107	1592	594	XP_004020364.1	LZTS2		leucine zipper, putative tumor suppressor 2	0	NM_032429.2	LZTS2	Leucine zipper putative tumor suppressor 2
CNTN4	158.186	580.709	0.272401	-1.8762	1.7368e-06	0.000383701	down	173	198	111	545	1011	313	XP_004018367.1	CNTN4		contactin 4	0	NM_175613.2	CNTN4	Contactin-4
CREG1.1	1941.57	896.037	2.16684	1.11559	1.74361e-06	0.000383701	up	1332	3160	1651	1046	696	769	XP_004002781.1	CREG1		cellular repressor of E1A-stimulated genes 1	2e-99	NM_003851.2	CREG1	cDNA PSEC0065 fis, clone NT2RP2000997, highly similar to Protein CREG1
IFFO1	129.434	208.626	0.620412	-0.688701	1.93262e-06	0.000421	down	119	149	122	201	273	152	XP_004007633.1	IFFO1		intermediate filament family orphan 1	0	NM_080731.3	IFFO1	Intermediate filament family orphan 1
KCNH1	5.59845	30.5678	0.183149	-2.44891	1.96337e-06	0.000423419	down	4	10	4	24	39	26	XP_004013965.1	KCNH1		potassium voltage-gated channel, subfamily H (eag-related), member 1	0	NM_172362.2	KCNH1	Potassium voltage-gated channel subfamily H member 1
FSTL5	16.4749	49.4635	0.333071	-1.5861	2.30308e-06	0.000488158	down	18	20	12	57	53	36	XP_004017327.1	FSTL5		follistatin-like 5	0	NM_020116.4	FSTL5	Putative uncharacterized protein DKFZp566D234
ZNF598	343.626	611.569	0.561877	-0.831675	2.30882e-06	0.000488158	down	252	527	298	562	912	409	ZNF598	ZNF598		zinc finger protein 598	0	NM_178167.3	ZNF598	Zinc finger protein 598
LOC101116002	1072.92	378.123	2.8375	1.50462	2.33926e-06	0.000489792	up	1043	1153	1011	396	128	430	XP_004002208.1	LOC101116002		epithelial chloride channel protein-like	0	NM_001285.3	CLCA1	Calcium-activated chloride channel regulator 1
NOP10	626.492	415.158	1.50905	0.593638	2.90691e-06	0.000591419	up	538	826	557	479	455	297	XP_004010463.1	NOP10		NOP10 ribonucleoprotein homolog (yeast)	6e-32	NM_018648.3	NOP10	H/ACA ribonucleoprotein complex subunit 3
PARVB	49.5437	27.8844	1.77676	0.829246	3.5561e-06	0.000712332	up	40	75	40	29	26	24	XP_004007090.1	PARVB		parvin, beta	1e-145	NM_013327.4	PARVB	Beta-parvin
FBXL19	141.342	302.966	0.466526	-1.09997	3.56727e-06	0.000712332	down	140	141	138	287	493	178	XP_004021278.1	FBXL19		F-box and leucine-rich repeat protein 19	0	NM_019085.1	FBXL19	cDNA FLJ56421, highly similar to F-box/LRR-repeat protein 19
LY6G5B	14.8347	43.3463	0.342237	-1.54693	3.90182e-06	0.000771988	down	18	21	7	36	61	33	XP_004018997.1	LY6G5B		lymphocyte antigen 6 complex, locus G5B	7e-81	NM_021221.2	LY6G5B	Lymphocyte antigen 6 complex locus protein G5b
PHF23	434.623	719.497	0.604065	-0.727224	3.95172e-06	0.000774754	down	363	565	402	675	1003	506	XP_004012689.1	PHF23		PHD finger protein 23	0	NM_024297.2	PHF23	PHD finger protein 23, isoform CRA_b
LOC101108131	14209.7	6405.13	2.21849	1.14958	4.00599e-06	0.000778316	up	10170	18144	15048	6154	8510	4616	XP_004009382.1	LOC101108131		complement C3-like	0	NM_000064.2	C3	cDNA FLJ57339, highly similar to Complement C3
FAM73B.1	136.003	254.487	0.53442	-0.903954	4.93533e-06	0.000950316	down	91	180	146	248	398	153	XP_004005634.1	FAM73B		family with sequence similarity 73, member B	0	NM_032809.2	FAM73B	Protein FAM73B
KIFC1	132.78	257.907	0.514835	-0.957818	5.16152e-06	0.00098228	down	97	144	156	240	348	188	XP_004018802.1	KIFC1		kinesin family member C1	0	NM_002263.3	KIFC1	cDNA FLJ53841, highly similar to Kinesin-like protein KIFC1
INHBA.1	2.13749	19.5424	0.109377	-3.19262	5.19243e-06	0.00098228	down	5	1	0	10	33	16	NM_001009458.1	INHBA		Inhibin beta A chain	0	NM_002192.2	INHBA	Inhibin, beta A (Activin A, activin AB alpha polypeptide), isoform CRA_a
LOC101102982	819.931	261.849	3.13131	1.64677	5.316e-06	0.000996913	up	534	1344	719	209	289	242	XP_004009612.1	LOC101102982		tachykinin-3-like	1e-26	NM_013251.3	TAC3	Tachykinin-3
MGLL	287.879	599.606	0.480114	-1.05855	5.86649e-06	0.00108283	down	194	382	307	625	991	311	XP_004018760.1	MGLL		monoglyceride lipase	3e-162	NM_007283.6	MGLL	Monoglyceride lipase
YIPF1	171.079	100.826	1.69677	0.762792	5.87459e-06	0.00108283	up	146	202	169	116	126	65	YIPF1	YIPF1		Yip1 domain family, member 1	1e-171	NM_018982.4	YIPF1	Protein YIPF1
S100A2	257.853	97.9042	2.63372	1.3971	6.87586e-06	0.00124609	up	137	356	302	60	132	90	XP_004002577.1	S100A2		S100 calcium binding protein A2	5e-46	NM_005978.3	S100A2	Protein S100-A2
CHRM3	9.08735	26.7464	0.339759	-1.55742	6.9658e-06	0.00125187	down	10	3	12	25	37	19	XP_004021424.1	CHRM3		Cholinergic receptor, muscarinic 3	0	NM_000740.2	CHRM3	Muscarinic acetylcholine receptor M3
TMEM8B	35.7072	72.6081	0.49178	-1.02391	7.4714e-06	0.00133164	down	31	58	24	75	99	48	XP_004004312.1	TMEM8B		transmembrane protein 8B	0	NM_016446.3	TMEM8B	Transmembrane protein 8B
LOC101117587	453.518	204.598	2.21663	1.14837	7.92817e-06	0.00140147	up	348	728	356	182	306	140	XP_004010176.1	LOC101117587		epididymis-specific alpha-mannosidase-like	0	NM_015274.1	MAN2B2	cDNA FLJ90765 fis, clone THYRO1000584, highly similar to Epididymis-specific alpha-mannosidase (EC 3.2.1.24)
LOC101106326	22.3872	52.7088	0.424734	-1.23537	8.33619e-06	0.00146161	down	14	37	20	57	81	29	XP_004009375.1	LOC101106326		EGF-like module-containing mucin-like hormone receptor-like 3-like	6e-106	NM_152939.1	EMR3	EMR3 protein
DOCK8	1173.83	761.495	1.54148	0.624316	8.45997e-06	0.00147135	up	1220	1444	904	834	901	540	XP_004005352.1	DOCK8		dedicator of cytokinesis 8	0	NM_203447.3	DOCK8	cDNA FLJ55533, highly similar to Dedicator of cytokinesis protein 8
TMEM237	400.215	240.523	1.66393	0.734597	8.53742e-06	0.00147294	up	385	473	352	307	328	124	XP_004004877.1	TMEM237		transmembrane protein 237	8e-177	NM_152388.3	TMEM237	Alternative protein TMEM237
NECAB3	38.7886	108.775	0.356595	-1.48764	8.63597e-06	0.00147812	down	30	67	27	98	143	83	XP_004014860.1	NECAB3		N-terminal EF-hand calcium binding protein 3	2e-167	NM_031232.3	NECAB3	Amyloid beta (A4) protein-binding, family A, member 2 binding protein, isoform CRA_d
RHCG	86.9997	34.9655	2.48816	1.31508	8.87022e-06	0.00150626	up	78	106	80	37	32	30	NM_001199791.1	RHCG		Ammonia transporter RhCG	0	NM_016321	RHCG	cDNA FLJ51019, highly similar to Homo sapiens Rhesus blood group, C glycoprotein (RHCG), mRNA
PTK2B	612.508	368.971	1.66005	0.731223	9.39029e-06	0.00158212	up	534	891	480	317	622	226	XP_004004207.1	PTK2B		PTK2B protein tyrosine kinase 2 beta	0	NM_173176.2	PTK2B	Protein-tyrosine kinase 2-beta
FTH1	14241.4	6034.55	2.35998	1.23878	9.82688e-06	0.00161877	up	14060	22464	8346	5527	6133	5402	NM_001009786.2	FTH1		Ferritin heavy chain	3e-86	NM_002032.2	FTH1	Ferritin heavy chain
XLOC_019586	53.8623	19.5737	2.75178	1.46036	9.829e-06	0.00161877	up	34	74	58	21	15	18	XLOC_019586	XLOC_019586
DBN1	1062.96	2184.78	0.486527	-1.03941	1.14983e-05	0.00187858	down	951	1197	1046	2945	2662	1183	XP_004008766.1	DBN1		drebrin 1	0	NM_080881.2	DBN1	cDNA FLJ36806 fis, clone ASTRO1000165, highly similar to Drebrin
TLR8	258.162	74.8976	3.44686	1.78528	1.19252e-05	0.00191742	up	263	384	159	117	106	24	NM_001135929.1	TLR8		Toll-like receptor 8	0	NM_138636	TLR8	cDNA FLJ56817, highly similar to Toll-like receptor 8
GNL1	620.842	1029.08	0.603299	-0.729055	1.22879e-05	0.00193431	down	503	808	589	1004	1307	761	XP_004019323.1	GNL1		guanine nucleotide binding protein-like 1	0	NM_005275.3	GNL1	cDNA FLJ53828, highly similar to Guanine nucleotide-binding protein-like 1
XLOC_023265	97.563	55.8319	1.74744	0.805244	1.30588e-05	0.0020174	up	85	125	88	82	60	30	XLOC_023265	XLOC_023265
LOC101106136	22.6728	4.04074	5.61104	2.48827	1.30963e-05	0.0020174	up	21	22	24	5	8	1	LOC101106136	LOC101106136		cyclin-A2-like
C14H19orf18	26.6903	4.32807	6.16679	2.62452	1.32034e-05	0.00201946	up	20	42	22	9	2	2	XP_004015513.1	C14H19orf18		chromosome 14 open reading frame, human C19orf18	8e-37	NM_152474.4	C19orf18	Uncharacterized protein C19orf18
LOC101116228	146.138	294.749	0.495804	-1.01216	1.36416e-05	0.00207179	down	156	151	128	369	430	143	XR_173182.1	LOC101116228		uncharacterized LOC101116228
SYK	650.628	256.077	2.54075	1.34526	1.51412e-05	0.00228346	up	734	890	383	296	255	195	XP_004004114.1	SYK		spleen tyrosine kinase	0	NM_003177.5	SYK	cDNA FLJ90539 fis, clone OVARC1000255, highly similar to Tyrosine-protein kinase SYK (EC 2.7.10.2)
B3GNT6	0	5.26194	0	-20	1.57205e-05	0.0023483	down	0	0	0	4	10	3	XP_004016771.1	B3GNT6		UDP-GlcNAc:betaGal beta-1,3-N-acetylglucosaminyltransferase 6 (core 3 synthase)	3e-121	NM_138706.4	B3GNT6	HCG2018639
LOC101106588	13.3272	39.3719	0.338496	-1.56279	1.58496e-05	0.0023483	down	15	21	6	52	50	21	XP_004009376.1	LOC101106588		EGF-like module-containing mucin-like hormone receptor-like 1-like	2e-143	NM_152939.1	EMR3	EMR3 protein
XLOC_019813	100.364	46.2736	2.16894	1.11699	1.67897e-05	0.00246317	up	105	117	81	67	57	22	XLOC_019813	XLOC_019813
GDF11	38.9074	63.0462	0.617125	-0.696366	1.71194e-05	0.00249457	down	38	44	35	76	80	38	XP_004007521.1	GDF11		growth differentiation factor 11	0	NM_005811.3	GDF11	Growth/differentiation factor 11
RYR3	132.393	314.198	0.421368	-1.24685	1.75241e-05	0.00253641	down	70	204	141	317	505	176	XP_004011020.1	RYR3		ryanodine receptor 3	0	NM_001243996.1	RYR3	Ryanodine receptor 3
MED6	823.798	546.173	1.50831	0.592933	1.77327e-05	0.00254949	up	795	1040	677	705	624	334	XP_004011106.1	MED6		mediator complex subunit 6	2e-138	NM_005466.3	MED6	Mediator of RNA polymerase II transcription subunit 6
LOC101116109	169.614	67.9903	2.49469	1.31886	1.81898e-05	0.0025979	up	192	222	106	111	58	37	XP_004003035.1	LOC101116109		ropporin-1-like	3e-106	NM_001012337.1	ROPN1B	NADH-ubiquinone oxidoreductase chain 1
TAC3	923.864	311.296	2.9678	1.56939	2.01302e-05	0.00285611	up	614	1585	750	293	348	259	XP_004006611.1	TAC3		Preprotachykinin B	3e-42	NM_013251.3	TAC3	Tachykinin-3
ING1	430.692	665.883	0.646797	-0.628615	2.04868e-05	0.00288139	down	333	567	420	639	951	449	XP_004012288.1	ING1		inhibitor of growth family, member 1	2e-136	NM_198219.2	ING1	Inhibitor of growth protein 1
LOC101107996	80.6745	2.08848	38.6283	5.27159	2.05756e-05	0.00288139	up	2	157	104	1	3	2	LOC101107996	LOC101107996		Ig lambda chain V-I region BL2-like
LRRN4	78.8615	37.7488	2.08911	1.06289	2.12388e-05	0.00295507	up	83	101	57	43	59	19	XP_004014767.1	LRRN4		leucine rich repeat neuronal 4	0	NM_152611.4	LRRN4	Leucine-rich repeat neuronal protein 4
JDP2	285.746	512.91	0.557108	-0.843971	2.1837e-05	0.00301434	down	288	294	268	613	753	264	XP_004011126.1	JDP2		Jun dimerization protein 2	2e-88	NM_130469.3	JDP2	Jun dimerization protein 2
LOC101123401	93.5452	14.1356	6.61772	2.72633	2.19443e-05	0.00301434	up	39	206	68	7	0	23	XP_004015480.1	LOC101123401		immunoglobulin alpha Fc receptor-like	3e-70	NM_133280.1	FCAR	FCAR
ELN.1	175.391	652.632	0.268744	-1.8957	2.30836e-05	0.00315076	down	176	200	152	464	1188	416	UPI0000129E70	ELN		Elastin
CYP2J	87.3585	51.6318	1.69195	0.758688	2.37381e-05	0.00321972	up	69	122	79	55	58	39	NM_001077210.1	CYP2J		Cytochrome P450 isoform 2J	0	NM_000775.2	CYP2J2	cDNA, FLJ96434, highly similar to Homo sapiens cytochrome P450, family 2, subfamily J, polypeptide 2 (CYP2J2), mRNA
RNF112	73.0097	148.609	0.491287	-1.02536	2.45434e-05	0.00330814	down	40	88	93	159	211	91	XP_004013376.1	RNF112		ring finger protein 112	0	NM_007148.4	RNF112	cDNA FLJ52256, highly similar to Zinc finger protein 179
AOAH	467.375	123.611	3.78103	1.91878	2.49255e-05	0.00333537	up	439	786	263	172	76	99	XP_004007943.1	AOAH		acyloxyacyl hydrolase (neutrophil)	0	NM_001637.3	AOAH	Acyloxyacyl hydrolase small subunit
WDFY4	873.618	440.924	1.98134	0.986473	2.50547e-05	0.00333537	up	912	1263	541	416	485	370	XP_004021606.1	WDFY4		WDFY family member 4	0	NM_020945.1	WDFY4	WD repeat- and FYVE domain-containing protein 4
STX1B	9.27815	48.4818	0.191374	-2.38554	2.59733e-05	0.00343644	down	10	17	3	35	62	43	NM_001009440.1	STX1B		Syntaxin-1B	1e-166	NM_052874.3	STX1B	Syntaxin-1B
UGT8	37.8733	18.2348	2.07698	1.05449	2.8416e-05	0.00369305	up	39	40	34	19	29	10	XP_004009645.1	UGT8		UDP glycosyltransferase 8	0	NM_003360.3	UGT8	cDNA FLJ52624, highly similar to 2-hydroxyacylsphingosine1-beta-galactosyltransferase (EC 2.4.1.45)
ITGAM	935.093	304.881	3.06708	1.61687	2.84265e-05	0.00369305	up	1117	1117	599	273	178	339	NM_001082593.1	ITGAM		CD11b	0	NM_001145808.1	ITGAM	cDNA FLJ45735 fis, clone JCMLC2000273, highly similar to Integrin alpha-M
2015-09-04	909.09	1576.95	0.576485	-0.794645	2.89756e-05	0.00372908	down	906	1103	749	1898	2268	826	XP_004012449.1	2015-09-04		septin 4	0	NM_080417.1	2015-09-04	cDNA, FLJ95349, highly similar to Homo sapiens septin 4 (SEPT4), transcript variant 4, mRNA
KRIT1	25.3716	5.23858	4.84322	2.27597	2.90497e-05	0.00372908	up	17	28	31	7	4	4	XP_004007759.1	KRIT1		KRIT1, ankyrin repeat containing	0	NM_194456.1	KRIT1	cDNA FLJ31975 fis, clone NT2RP7008190, highly similar to Krev interaction trapped protein 1
LOC101106844	20.218	7.7673	2.60296	1.38015	3.063e-05	0.00390867	up	14	33	17	11	5	6	XP_004009377.1	LOC101106844		EGF-like module-containing mucin-like hormone receptor-like 4-like	4e-149	NM_152939.1	EMR3	EMR3 protein
LOC101105235	204.67	310.931	0.658251	-0.60329	3.17686e-05	0.00403013	down	148	300	189	311	457	196	XP_004007124.1	LOC101105235		TNF receptor-associated factor 2-like	0	NM_021138.3	TRAF2	cDNA FLJ53315, highly similar to TNF receptor-associated factor 2
PPP1R12C	253.019	419.499	0.603145	-0.729423	3.31243e-05	0.00417754	down	218	331	226	506	576	232	XP_004015938.1	PPP1R12C		protein phosphatase 1, regulatory subunit 12C	8e-138	NM_017607.3	PPP1R12C	Protein phosphatase 1 regulatory subunit 12C
RALGAPA2	771.112	468.951	1.64433	0.717504	3.55505e-05	0.00445746	up	820	855	639	477	708	282	XP_004014746.1	RALGAPA2		Ral GTPase activating protein, alpha subunit 2 (catalytic)	0	NM_020343.3	RALGAPA2	Ral GTPase-activating protein subunit alpha-2
MCOLN2	41.4879	14.9881	2.76806	1.46888	3.68924e-05	0.00459896	up	33	51	42	28	15	5	XP_004002192.1	MCOLN2		mucolipin 2	0	NM_153259.2	MCOLN2	Mucolipin-2
CD37	133.835	42.7313	3.13201	1.64709	3.88085e-05	0.00481002	up	122	228	77	57	51	24	XP_004015854.1	CD37		CD37 molecule	2e-110	NM_001774.2	CD37	cDNA FLJ58471, highly similar to Leukocyte antigen CD37
FBXO15	92.9498	48.337	1.92295	0.943322	3.91954e-05	0.00483022	up	75	132	81	65	51	30	XP_004020447.1	FBXO15		F-box protein 15	0	NM_152676.2	FBXO15	F-box only protein 15
ADAMTS10	257.636	450.105	0.57239	-0.80493	4.33942e-05	0.00528162	down	198	384	222	451	605	310	XP_004009373.1	ADAMTS10		ADAM metallopeptidase with thrombospondin type 1 motif, 10	0	NM_030957.3	ADAMTS10	A disintegrin and metalloproteinase with thrombospondin motifs 10
CCDC28A	164.189	63.9039	2.56931	1.36138	4.37618e-05	0.00528162	up	125	228	154	58	102	40	XP_004011573.1	CCDC28A		coiled-coil domain containing 28A	3e-100	NM_015439.2	CCDC28A	coiled-coil domain containing 28A
MLEC	731.144	1291.53	0.566108	-0.82085	4.3838e-05	0.00528162	down	697	679	775	1308	1950	780	XP_004017657.1	MLEC		malectin	2e-124	NM_014730.2	MLEC	Malectin
S100A1	316.554	96.4056	3.28357	1.71526	4.49192e-05	0.00538182	up	203	517	282	78	137	74	XP_004002578.1	S100A1		S100 calcium binding protein A1	1e-48	NM_006271.1	S100A1	Protein S100-A1
SLC9A5	93.1817	213.558	0.436329	-1.19651	4.51722e-05	0.00538223	down	86	136	68	192	315	147	XP_004015635.1	SLC9A5		solute carrier family 9, subfamily A (NHE5, cation proton antiporter 5), member 5	0	NM_004594.2	SLC9A5	Sodium/hydrogen exchanger 5
TMEM27	108.704	41.502	2.61924	1.38915	4.78441e-05	0.0055913	up	101	139	92	72	63	7	XP_004022590.1	TMEM27		transmembrane protein 27	2e-72	NM_020665.5	TMEM27	Collectrin
CCHCR1	172.174	276.545	0.622589	-0.683649	4.80935e-05	0.0055913	down	166	208	148	359	339	157	XP_004019029.1	CCHCR1		coiled-coil alpha-helical rod protein 1	0	NM_019052.3	CCHCR1	Coiled-coil alpha-helical rod protein 1
WDR46	590.235	1051.24	0.561463	-0.832737	4.81758e-05	0.0055913	down	463	724	605	1214	1172	742	XP_004018798.1	WDR46		WD repeat domain 46	0	NM_005452.5	WDR46	Chromosome 6 open reading frame 11
SLC39A7	1021.06	1665.41	0.613095	-0.705816	4.82232e-05	0.0055913	down	771	1272	1063	1462	2394	1197	NM_001163602.1	SLC39A7		SLC39A7	0	NM_006979.2	SLC39A7	cDNA FLJ54178, highly similar to Zinc transporter SLC39A7
CDH8	23.5664	82.2945	0.286367	-1.80406	4.85951e-05	0.00560428	down	29	30	13	101	114	44	XP_004015093.1	CDH8		cadherin 8, type 2	0	NM_001796.4	CDH8	Cadherin-8
CDC42BPG.1	108.264	304.468	0.355582	-1.49174	4.99026e-05	0.00569667	down	85	196	68	339	518	138	XP_004019932.1	CDC42BPG		CDC42 binding protein kinase gamma (DMPK-like)	0	NM_017525.2	CDC42BPG	Serine/threonine-protein kinase MRCK gamma
PHACTR3	31.8356	97.9771	0.324929	-1.6218	5.31165e-05	0.00593528	down	33	43	22	133	131	47	XP_004014476.1	PHACTR3		phosphatase and actin regulator 3	0	NM_183246.1	PHACTR3	Phosphatase and actin regulator 3
RNF175	10.8525	32.8308	0.330558	-1.59703	5.36825e-05	0.00593701	down	13	4	13	29	44	25	XP_004017564.1	RNF175		ring finger protein 175	4e-174	NM_173662.2	RNF175	RING finger protein 175
WHSC2	269.959	639.818	0.421931	-1.24492	5.46495e-05	0.00598786	down	135	456	268	540	987	441	XP_004010201.1	WHSC2		Wolf-Hirschhorn syndrome candidate 2	3e-149	NM_005663.4	NELFA	cDNA FLJ10442 fis, clone NT2RP1000738, highly similar to Negative elongation factor A
TRNAE-UUC.29	0.751945	8.02822	0.0936627	-3.41638	5.47596e-05	0.00598786	down	2	0	0	7	9	7	TRNAE-UUC	TRNAE-UUC		transfer RNA glutamic acid (anticodon UUC)
ASCC2	424.043	670.199	0.632712	-0.660379	5.49753e-05	0.00598786	down	409	501	372	687	1094	361	XP_004017516.1	ASCC2		activating signal cointegrator 1 complex subunit 2	0	NM_032204.4	ASCC2	Activating signal cointegrator 1 complex subunit 2
NYAP1	61.7145	165.989	0.3718	-1.4274	5.67387e-05	0.00614888	down	49	115	36	190	270	78	XP_004023717.1	NYAP1		neuronal tyrosine-phosphorylated phosphoinositide-3-kinase adaptor 1	0	NM_173564.3	NYAP1	Neuronal tyrosine-phosphorylated phosphoinositide-3-kinase adapter 1
BOP1.1	128.52	205.682	0.624848	-0.678422	6.04688e-05	0.00652035	down	109	135	139	211	278	138	XP_004023299.1	BOP1		block of proliferation 1	2e-138	NM_015201.3	BOP1	cDNA FLJ78061, highly similar to Homo sapiens block of proliferation 1, mRNA
LOC101120622	66.196	25.0998	2.63731	1.39907	6.09856e-05	0.00654336	up	65	84	53	47	30	6	XP_004020438.1	LOC101120622		frizzled-3-like	6e-48	NM_145866.1	FZD3	cDNA FLJ77990, highly similar to Homo sapiens FZD3 WNT receptor frizzled-3
SYT15	45.8759	100.968	0.454361	-1.13809	6.35548e-05	0.00678526	down	23	62	56	89	148	71	XP_004021705.1	SYT15		synaptotagmin XV	0	NM_181519.2	SYT15	Synaptotagmin-15
FGF16	0.515264	7.66111	0.0672571	-3.89417	6.82714e-05	0.00722169	down	0	2	0	6	13	5	XP_004022681.1	FGF16		fibroblast growth factor 16	2e-75	NM_003868.1	FGF16	Fibroblast growth factor 16
MGARP	12.6631	54.0624	0.234231	-2.094	6.83124e-05	0.00722169	down	11	11	15	54	48	49	XP_004017294.1	MGARP		mitochondria-localized glutamic acid-rich protein	6e-82	NM_032623.3	MGARP	Protein MGARP
DAPP1	99.1741	57.6064	1.72158	0.783733	7.31938e-05	0.00768699	up	86	146	77	56	62	48	XP_004009724.1	DAPP1		dual adaptor of phosphotyrosine and 3-phosphoinositides	6e-160	NM_014395.2	DAPP1	Dual adapter for phosphotyrosine and 3-phosphotyrosine and 3-phosphoinositide
TMEFF2	55.6095	29.4876	1.88586	0.915225	7.93531e-05	0.00818818	up	42	75	54	39	22	23	XP_004004827.1	TMEFF2		transmembrane protein with EGF-like and two follistatin-like domains 2	0	NM_016192.2	TMEFF2	cDNA, FLJ96422, highly similar to Homo sapiens transmembrane protein with EGF-like and two follistatin-like domains 2 (TMEFF2), mRNA
ZNF697	210.346	334.021	0.62974	-0.667172	8.16101e-05	0.00834125	down	189	218	219	337	425	240	ZNF697	ZNF697		zinc finger protein 697	0	NM_001080470.1	ZNF697	Zinc finger protein 697
CDC6	82.836	128.768	0.643297	-0.636443	8.61947e-05	0.00876828	down	60	122	76	133	197	75	XP_004012910.1	CDC6		cell division cycle 6 homolog (S. cerevisiae)	0	NM_001254.3	CDC6	cDNA, FLJ94190, highly similar to Homo sapiens CDC6 cell division cycle 6 homolog (S. cerevisiae)(CDC6), mRNA
CHD5	11.152	70.9205	0.157246	-2.6689	9.31356e-05	0.00942467	down	9	11	13	37	119	58	XP_004014081.1	CHD5		chromodomain helicase DNA binding protein 5	0	NM_015557.2	CHD5	cDNA FLJ34067 fis, clone FCBBF3001914, highly similar to Chromodomain helicase-DNA-binding protein 5 (EC 3.6.1.-)
SYCP2L	52.4954	9.92237	5.29062	2.40344	9.35213e-05	0.00942467	up	45	88	34	5	15	9	XP_004019403.1	SYCP2L		synaptonemal complex protein 2-like	0	NM_194299.1	SYCP2L	Synaptonemal complex protein 2-like
RPS3A	47480.2	21499.3	2.20846	1.14304	9.50701e-05	0.00953619	up	35594	89059	29385	16904	22393	20654	XP_004017251.1	RPS3A		ribosomal protein S3A	5e-155	NM_001267699.1	RPS3A	40S ribosomal protein S3a
AEN	82.0613	154.779	0.530185	-0.915432	9.76043e-05	0.00970016	down	49	110	93	136	244	101	XP_004018084.1	AEN		apoptosis enhancing nuclease	1e-142	NM_022767.3	AEN	Apoptosis-enhancing nuclease
LOC101104747	8.39409	1.25776	6.67384	2.73852	9.86228e-05	0.00975642	up	7	15	5	0	3	1	XP_004009438.1	LOC101104747		60S ribosomal protein L23-like	1e-40	NM_000978.3	RPL23	60S ribosomal protein L23
XLOC_005122	31.6402	5.47783	5.77605	2.53008	0.000100961	0.00994209	up	31	54	16	12	5	1	XLOC_005122	XLOC_005122
RMND1	287.043	171.141	1.67723	0.746081	0.000103315	0.0101277	up	279	349	243	250	194	88	XP_004011462.1	RMND1		required for meiotic nuclear division 1 homolog (S. cerevisiae)	0	NM_017909.3	RMND1	Required for meiotic nuclear division protein 1 homolog
ACAP3	443.254	954.548	0.46436	-1.10668	0.000106679	0.0103632	down	291	680	418	770	1492	670	XP_004013835.1	ACAP3		ArfGAP with coiled-coil, ankyrin repeat and PH domains 3	0	NM_030649.2	ACAP3	Arf-GAP with coiled-coil, ANK repeat and PH domain-containing protein 3
OSBPL7	170.882	281.994	0.605977	-0.722665	0.00010831	0.0104401	down	138	263	135	254	405	199	XP_004012866.1	OSBPL7		oxysterol binding protein-like 7	0	NM_145798.2	OSBPL7	Oxysterol-binding protein-related protein 7
TLE2	76.0179	174.245	0.436271	-1.1967	0.000108438	0.0104401	down	78	84	66	162	303	95	XP_004008670.1	TLE2		transducin-like enhancer of split 2 (E(sp1) homolog, Drosophila)	0	NM_003260.4	TLE2	Transducin-like enhancer protein 2
SNAP25	300.481	154.647	1.94302	0.958299	0.000108957	0.0104434	up	295	450	194	183	201	93	XP_004014204.1	SNAP25		synaptosomal-associated protein, 25kDa	4e-117	NM_130811.2	SNAP25	Synaptosomal-associated protein 25
LSM14B	389.639	639.407	0.609375	-0.714598	0.000121676	0.011509	down	375	504	313	714	996	332	XP_004014803.1	LSM14B		LSM14B, SCD6 homolog B (S. cerevisiae)	8e-168	NM_144703.2	LSM14B	Protein LSM14 homolog B
GPX2	143.662	50.4803	2.84591	1.50889	0.00012321	0.0116033	up	151	159	121	60	47	39	XP_004010769.1	GPX2		glutathione peroxidase 2 (gastrointestinal)	6e-107	NM_002083.3	GPX2	Glutathione peroxidase 2
HPDL	6.45195	17.9721	0.358997	-1.47795	0.000128182	0.011967	down	4	3	11	17	22	14	XP_004001958.1	HPDL		4-hydroxyphenylpyruvate dioxygenase-like	2e-174	NM_032756.2	HPDL	4-hydroxyphenylpyruvate dioxygenase-like protein
TMEM229B	128.752	257.07	0.500844	-0.997566	0.000130783	0.0121572	down	102	180	116	185	431	180	XP_004010783.1	TMEM229B		transmembrane protein 229B	5e-94	NM_182526.2	TMEM229B	Transmembrane protein 229B
SPINT1	108.575	59.0234	1.83953	0.879339	0.000131828	0.0122017	up	77	175	91	92	54	33	XP_004010504.1	SPINT1		serine peptidase inhibitor, Kunitz type 1	0	NM_181642.2	SPINT1	cDNA, FLJ95704, highly similar to Homo sapiens serine protease inhibitor, Kunitz type 1 (SPINT1), mRNA
ROS1	134.496	26.821	5.01456	2.32612	0.000135739	0.0124917	up	174	137	89	18	25	29	XP_004011221.1	ROS1		c-ros oncogene 1 , receptor tyrosine kinase	0	NM_002944.2	ROS1	Proto-oncogene tyrosine-protein kinase ROS
MBNL3	108.32	35.8784	3.0191	1.59412	0.000136119	0.0124917	up	84	180	80	43	81	5	XP_004022389.1	MBNL3		muscleblind-like splicing regulator 3	9e-179	NM_133486.2	MBNL3	Muscleblind-like protein 3
NXPE2	86.2043	42.3506	2.03549	1.02538	0.000138754	0.012626	up	81	128	60	65	33	27	XP_004016088.1	NXPE2		neurexophilin and PC-esterase domain family, member 2	0	NM_182495.5	NXPE2	NXPE family member 2
CDS1	200.277	70.5492	2.83882	1.50529	0.000140112	0.012696	up	245	218	137	122	82	24	XP_004010158.1	CDS1		CDP-diacylglycerol synthase (phosphatidate cytidylyltransferase) 1	0	NM_001263.3	CDS1	Phosphatidate cytidylyltransferase 1
SLC36A1	161.707	76.2558	2.12058	1.08446	0.000155899	0.0139507	up	136	192	161	58	148	42	XP_004009039.1	SLC36A1		solute carrier family 36 (proton/amino acid symporter), member 1	0	NM_078483.2	SLC36A1	Dct1
RIIAD1	23.2994	4.45277	5.23256	2.38752	0.000158065	0.0140296	up	13	42	20	8	8	0	XP_004002550.1	RIIAD1		regulatory subunit of type II PKA R-subunit (RIIa) domain containing 1	1e-35	NM_001144956.1	RIIAD1	regulatory subunit of type II PKA R-subunit (RIIa) domain containing 1
GOLPH3L	1729.79	1089.9	1.58712	0.666407	0.000158082	0.0140296	up	1364	2418	1565	1319	1021	825	XP_004002509.1	GOLPH3L		golgi phosphoprotein 3-like	4e-158	NM_018178.5	GOLPH3L	Golgi phosphoprotein 3-like
CP	135.532	47.0776	2.87892	1.52553	0.000162179	0.0142325	up	135	167	110	59	45	34	NM_001009733.1	CP		Ceruloplasmin	0	NM_000096.3	CP	CP protein
LOC101118186	101.152	189.308	0.534323	-0.904215	0.000162348	0.0142325	down	67	121	118	200	238	132	XP_004009233.1	LOC101118186		uncharacterized LOC101118186	1e-58	NM_016270.2	KLF2	Similar to Kruppel-like factor 2 (Lung)
C23H18orf54	263.511	147.845	1.78235	0.83378	0.000163342	0.0142617	up	293	305	197	165	213	85	XP_004020602.1	C23H18orf54		chromosome 23 open reading frame, human C18orf54	8e-153	NM_173529	C18orf54	Lung adenoma susceptibility protein 2
LOC101103863	38.1203	21.3219	1.78785	0.838226	0.000166383	0.0143878	up	31	60	29	16	39	13	LOC101103863	LOC101103863		52 kDa repressor of the inhibitor of the protein kinase-like
PARP16	529.714	315.883	1.67693	0.745824	0.000166788	0.0143878	up	372	781	497	303	409	233	XP_004010280.1	PARP16		poly (ADP-ribose) polymerase family, member 16	5e-173	NM_017851.4	PARP16	Mono [ADP-ribose] polymerase PARP16
LOC101102259	1.50389	10.5454	0.142611	-2.80985	0.000167497	0.0143914	down	4	0	0	13	18	4	XP_004015942.1	LOC101102259		NACHT, LRR and PYD domains-containing protein 2-like	0	NM_206828.3	NLRP7	cDNA FLJ60981, highly similar to NACHT, LRR and PYD-containing protein 7
LOC101114849	7.45435	0.556597	13.3927	3.74338	0.000175407	0.0149519	up	8	4	9	1	1	0	XP_004005348.1	LOC101114849		uncharacterized LOC101114849	4e-17	NM_021109.3	TMSB4X	Thymosin, beta 4, X-linked, isoform CRA_a
LOC101104348	1015.98	592.054	1.71603	0.779071	0.00018143	0.0153984	up	988	1466	703	681	769	368	XR_173382.1	LOC101104348		uncharacterized LOC101104348
LAPTM5	2267.49	1224.55	1.8517	0.88885	0.000185249	0.0156058	up	1963	3270	1810	1562	809	1039	XP_004005099.1	LAPTM5		lysosomal protein transmembrane 5	8e-124	NM_006762.2	LAPTM5	cDNA FLJ57504, highly similar to Lysosomal-associated multitransmembrane protein
TRNAK-UUU.5	209.488	3.33789	62.7605	5.97178	0.000186595	0.015658	up	374	148	81	0	3	5	TRNAK-UUU	TRNAK-UUU		transfer RNA lysine (anticodon UUU)
GPR21	86.1215	36.7849	2.34122	1.22726	0.000190517	0.0159252	up	92	91	74	56	45	16	XP_004005701.1	GPR21		G protein-coupled receptor 21	0	NM_005294.2	GPR21	cDNA FLJ60850, highly similar to Probable G-protein coupled receptor 21
LOC101122496	236.776	111.38	2.12585	1.08804	0.000191764	0.0159675	up	275	310	141	100	113	101	XP_004003802.1	LOC101122496		multidrug resistance-associated protein 1-like	0	NM_019902.1	ABCC1	ATP-binding cassette transporter variant ABCC1delta-ex13&14
GRIN3A	2.78904	23.0645	0.120924	-3.04783	0.00020052	0.0166324	down	1	2	5	20	22	22	XP_004004089.1	GRIN3A		glutamate receptor, ionotropic, N-methyl-D-aspartate 3A	0	NM_133445.2	GRIN3A	Glutamate receptor, ionotropic, N-methyl-D-aspartate 3A
WNT2	148.959	47.1126	3.16177	1.66073	0.000202723	0.0167506	up	153	212	97	40	48	44	NM_001195319.1	WNT2		Protein Wnt-2	0	NM_003391.2	WNT2	Protein Wnt-2
TMEM245	835.452	552.696	1.5116	0.596072	0.000210221	0.0173039	up	847	946	720	591	600	426	XP_004005262.1	TMEM245		transmembrane protein 245	0	NM_032012.3	TMEM245	Transmembrane protein 245
TMEM128	178.631	86.2865	2.07021	1.04978	0.000214805	0.017614	up	169	239	141	148	92	34	XP_004010042.1	TMEM128		transmembrane protein 128	8e-66	NM_032927.2	TMEM128	Transmembrane protein 128, isoform CRA_b
SDR42E1	90.5418	46.8684	1.93183	0.94997	0.000222555	0.0180437	up	73	102	97	46	50	39	XP_004014981.1	SDR42E1		short chain dehydrogenase/reductase family 42E, member 1	0	NM_145168.2	SDR42E1	Short-chain dehydrogenase/reductase family 42E member 1
TTC8	299.26	186.524	1.60441	0.682039	0.000228658	0.0184691	up	302	410	211	219	264	103	XP_004011145.1	TTC8		tetratricopeptide repeat domain 8	0	NM_198310	TTC8	cDNA FLJ36572 fis, clone TRACH2012298, highly similar to Tetratricopeptide repeat protein 8
TLL2	369.746	799.257	0.462612	-1.11212	0.00023214	0.0186803	down	336	357	399	675	1450	448	XP_004020348.1	TLL2		tolloid-like 2	0	NM_012465.3	TLL2	Tolloid-like protein 2
CARD14	0.515264	17.9025	0.0287816	-5.11871	0.000238732	0.0189981	down	0	2	0	13	31	12	XP_004013138.1	CARD14		caspase recruitment domain family, member 14	0	NM_052819.2	CARD14	Caspase recruitment domain-containing protein 14
ICOS	26.3938	5.70873	4.62341	2.20896	0.000269811	0.0212363	up	27	38	17	16	3	0	XP_004004895.1	ICOS		inducible T-cell co-stimulator	6e-86	NM_012092.3	ICOS	Inducible T-cell co-stimulator
LAT2	214.99	61.1933	3.5133	1.81283	0.000272833	0.0213961	up	123	241	281	67	50	54	XP_004010382.1	LAT2		L-type amino acid transporter subunit LAT2	0	NM_182728.2	SLC7A8	cDNA FLJ37231 fis, clone BRAMY2001068, highly similar to Large neutral amino acids transporter small subunit 2
WRNIP1	274.202	460.53	0.595406	-0.748055	0.000278142	0.0215942	down	197	354	287	450	784	246	XP_004023543.1	WRNIP1		Werner helicase interacting protein 1	2e-121	NM_130395.2	WRNIP1	cDNA FLJ37504 fis, clone BRAWH2017103, highly similar to ATPase WRNIP1
HOOK2	152.382	230.001	0.662529	-0.593944	0.00027908	0.0215942	down	151	212	108	276	299	136	XP_004008540.1	HOOK2		hook homolog 2 (Drosophila)	0	NM_013312.2	HOOK2	Protein Hook homolog 2
WDR7	1107.17	700.469	1.58061	0.660485	0.000279365	0.0215942	up	861	1553	1010	627	1221	395	XP_004020614.1	WDR7		WD repeat domain 7	0	NM_052834.2	WDR7	WD repeat domain 7
MPZ	7.83692	29.4677	0.26595	-1.91078	0.000280804	0.0216279	down	11	7	5	40	27	20	XP_004003770.1	MPZ		myelin protein zero	4e-120	NM_000530.6	MPZ	Myelin protein P0
IKZF1	198.875	116.4	1.70855	0.772771	0.000286445	0.0219839	up	150	307	167	105	199	67	XP_004007744.1	IKZF1		IKAROS family zinc finger 1 (Ikaros)	0	NM_006060.4	IKZF1	DNA-binding protein Ikaros
HK3	173.706	74.7291	2.32448	1.21691	0.000290561	0.0221457	up	207	188	125	106	60	52	XP_004008754.1	HK3		hexokinase 3 (white cell)	0	NM_002115.2	HK3	Hexokinase-3
LENG1	63.373	122.549	0.517123	-0.95142	0.000290607	0.0221457	down	51	92	54	95	188	90	XP_004015484.1	LENG1		leukocyte receptor cluster (LRC) member 1	4e-97	NM_024316.1	LENG1	Leukocyte receptor cluster member 1
RHOF	31.2146	80.7197	0.386703	-1.3707	0.000293739	0.0223056	down	40	51	8	63	126	58	NM_001127285.1	RHOF		RhoF	4e-115	NM_019034.2	RHOF	cDNA FLJ75043, highly similar to Homo sapiens ras homolog gene family, member F (in filopodia), mRNA
PRDM1	477.464	292.608	1.63175	0.706423	0.000305299	0.0228871	up	332	778	401	310	333	220	XP_004011288.1	PRDM1		PR domain containing 1, with ZNF domain	0	NM_182907.2	PRDM1	cDNA FLJ76731, highly similar to Homo sapiens PR domain containing 1, with ZNF domain (PRDM1), transcript variant 1, mRNA
LOC101105099	29.9431	4.84145	6.18475	2.62871	0.000305441	0.0228871	up	20	34	36	14	2	0	XP_004015897.1	LOC101105099		vomeronasal type-1 receptor 4-like	2e-102	NM_173857.2	VN1R4	Vomeronasal type-1 receptor 4
UBXN10	135.147	53.506	2.52582	1.33675	0.000305643	0.0228871	up	82	262	97	68	64	32	XP_004005579.1	UBXN10		UBX domain protein 10	4e-112	NM_152376.3	UBXN10	UBX domain protein 10
BCL2L15	37.1596	19.5521	1.90054	0.926412	0.000307056	0.0229134	up	34	46	33	16	17	20	XP_004002393.1	BCL2L15		BCL2-like 15	2e-65	NM_001029946.1	BCL2L15	Bcl-2-like protein 15
LOC101116576	16.9488	1.24275	13.6381	3.76958	0.000310736	0.023108	up	18	13	18	4	0	0	XP_004010793.1	LOC101116576		sentrin-specific protease 8-like	9e-106	NM_145204.3	SENP8	cDNA FLJ77372, highly similar to Homo sapiens SUMO/sentrin specific peptidase family member 8 (SENP8), mRNA
SLC13A5	59.5638	10.0519	5.92561	2.56696	0.000349472	0.0257226	up	40	108	44	7	13	9	XP_004012630.1	SLC13A5		solute carrier family 13 (sodium-dependent citrate transporter), member 5	0	NM_177550.4	SLC13A5	Solute carrier family 13 (Sodium-dependent citrate transporter), member 5, isoform CRA_a
L1CAM	16.4266	43.1206	0.380945	-1.39235	0.000353065	0.0258986	down	9	30	14	36	77	25	XP_004022312.1	L1CAM		L1 cell adhesion molecule	0	NM_024003.3	L1CAM	Neural cell adhesion molecule L1
MARVELD1	74.6811	182.887	0.408346	-1.29214	0.000359516	0.0262825	down	62	111	60	143	341	105	XP_004023411.1	MARVELD1		MARVEL domain containing 1	6e-23	NM_031484.3	MARVELD1	MARVEL domain-containing protein 1
LOC101112305	10.7647	35.4008	0.30408	-1.71748	0.000372833	0.0271639	down	15	14	4	51	33	22	LOC101112305	LOC101112305		putative heterogeneous nuclear ribonucleoprotein A1-like 3-like
SYT2	6.10712	26.2115	0.232994	-2.10164	0.000376457	0.0273356	down	2	9	8	15	39	23	XP_004014183.1	SYT2		synaptotagmin II	2e-93	NM_177402.4	SYT2	SYT2 protein
PTGDR2	0	7.95024	0	-20	0.000386553	0.0278098	down	0	0	0	2	15	7	XP_004019885.1	PTGDR2		prostaglandin D2 receptor 2	9e-105	NM_004778.2	PTGDR2	cDNA FLJ75694, highly similar to Homo sapiens G protein-coupled receptor 44 (GPR44), mRNA
S100A12	290.191	31.3833	9.24668	3.20893	0.000386857	0.0278098	up	225	524	186	14	19	43	XP_004002571.1	S100A12		S100 calcium binding protein A12	7e-31	NM_005621.1	S100A12	Protein S100-A12
METTL4	139.131	81.575	1.70556	0.770247	0.000390937	0.0280098	up	134	206	94	94	103	52	NM_001267877.1	METTL4		Methyltransferase-like protein 4	0	NM_022840.3	METTL4	cDNA FLJ77270, highly similar to Homo sapiens methyltransferase like 4 (METTL4), mRNA
ALG1	291.508	156.028	1.8683	0.901728	0.000394032	0.0281068	up	189	452	274	194	161	108	XP_004021212.1	ALG1		asparagine-linked glycosylation 1, beta-1,4-mannosyltransferase homolog (S. cerevisiae)	0	NM_019109.4	ALG1	cDNA FLJ61145, highly similar to Chitobiosyldiphosphodolichol beta-mannosyltransferase (EC 2.4.1.142)
LPCAT2	152.341	87.3104	1.74482	0.803075	0.000394897	0.0281068	up	144	225	106	119	118	41	XP_004015039.1	LPCAT2		lysophosphatidylcholine acyltransferase 2	0	NM_017839.4	LPCAT2	Lysophosphatidylcholine acyltransferase 2
CCDC42	7.16519	54.1055	0.13243	-2.9167	0.000400436	0.0283141	down	2	19	4	64	44	45	XP_004012741.1	CCDC42		coiled-coil domain containing 42	4e-155	NM_144681.2	CCDC42	coiled-coil domain containing 42
XLOC_036693	241.06	126.646	1.90342	0.928596	0.000405514	0.0285795	up	203	305	227	127	160	92	XLOC_036693	XLOC_036693
FAM216A	113.538	69.8083	1.62643	0.701709	0.000410655	0.0288475	up	103	174	79	82	83	46	XP_004017630.1	FAM216A		family with sequence similarity 216, member A	7e-98	NM_013300.2	FAM216A	family with sequence similarity 216, member A
STRN4	391.838	726.473	0.53937	-0.890652	0.000430023	0.03011	down	377	461	346	578	1266	453	XP_004015818.1	STRN4		striatin, calmodulin binding protein 4	0	NM_013403.2	STRN4	cDNA FLJ31732 fis, clone NT2RI2006856, highly similar to Striatin-4
NFKBIA	10.5292	0.310688	33.8898	5.08278	0.000432752	0.0301482	up	5	10	16	1	0	0	NM_001166184.1	NFKBIA		nuclear factor of kappa light polypeptide gene enhancer in B-cells inhibitor, alpha	9e-172	NM_020529.2	NFKBIA	NF-kappa-B inhibitor alpha
BRICD5	31.8086	64.271	0.494914	-1.01475	0.000433365	0.0301482	down	29	34	32	59	98	42	XP_004021169.1	BRICD5		BRICHOS domain containing 5	9e-74	NM_182563.3	BRICD5	BRICHOS domain-containing protein 5
SLC11A1	90.0777	31.483	2.86116	1.5166	0.000439034	0.0304444	up	67	134	80	10	16	47	NM_001009345.1	SLC11A1		Natural resistance-associated macrophage protein 1	0	NM_001032220.1	SLC11A1	cDNA FLJ60324, highly similar to Natural resistance-associated macrophage protein 1
LOC101116273	581.593	325.59	1.78627	0.836954	0.000442263	0.03057	up	531	631	578	376	278	270	XP_004020378.1	LOC101116273		glutathione S-transferase omega-1-like	8e-112	NM_004832.2	GSTO1	cDNA, FLJ94267, highly similar to Homo sapiens glutathione S-transferase omega 1 (GSTO1), mRNA
XLOC_032521	8.92729	0	Inf	20	0.00045868	0.0313035	up	2	17	10	0	0	0	XLOC_032521	XLOC_032521
LOC101119338	424.728	890.781	0.476804	-1.06853	0.000464724	0.0316159	down	450	572	285	1172	1300	398	XP_004018643.1	LOC101119338		zinc finger protein 652-A-like	0	NM_145166.3	ZBTB47	Zinc finger and BTB domain-containing protein 47
LOC101114265	133.715	243.726	0.548626	-0.866106	0.000476667	0.0323264	down	150	141	108	228	407	140	XP_004007648.1	LOC101114265		putative ATP-dependent RNA helicase DDX11-like protein 8-like	0	NM_152438.1	DDX11	cDNA FLJ60129, highly similar to Probable ATP-dependent RNA helicase DDX11 (EC 3.6.1.-)
MFSD11.1	418.931	262.774	1.59426	0.672891	0.000480951	0.0325147	up	443	489	333	330	271	180	XP_004013152.1	MFSD11		major facilitator superfamily domain containing 11	0	NM_024311.3	MFSD11	UNC93-like protein MFSD11
GBX2	5.19076	28.6823	0.180974	-2.46614	0.000483223	0.0325662	down	8	7	1	28	58	11	XP_004001821.1	GBX2		gastrulation brain homeobox 2	1e-180	NM_001485.2	GBX2	Homeobox protein GBX-2
XLOC_001539	24.5844	54.6246	0.45006	-1.15181	0.000495718	0.0331341	down	21	25	27	46	90	35	XLOC_001539	XLOC_001539
LOC101103624	46.3198	10.3991	4.45423	2.15518	0.000496258	0.0331341	up	50	42	44	23	9	2	XP_004022131.1	LOC101103624		G antigen family C member 1-like	2e-14	NM_007003.3	PAGE4	P antigen family member 4
LMOD3	9.57749	54.6421	0.175277	-2.51229	0.000501131	0.0333561	down	17	5	5	80	45	36	XP_004018383.1	LMOD3		leiomodin 3 (fetal)	0	NM_198271.3	LMOD3	Leiomodin-3
WIPF1	235.055	145.576	1.61466	0.691231	0.000529295	0.0350146	up	211	326	189	123	223	101	XP_004004625.1	WIPF1		WAS/WASL interacting protein family, member 1	9e-66	NM_003387.4	WIPF1	cDNA FLJ56555, highly similar to Wiskott-Aldrich syndrome protein-interacting protein
C7H15orf57	637.497	376.599	1.69278	0.759392	0.000544637	0.0359194	up	525	898	550	522	449	200	XP_004010495.1	C7H15orf57		chromosome 7 open reading frame, human C15orf57	5e-89	NM_052849	C15orf57	chromosome 15 open reading frame 57
TBC1D10B	481.613	864.188	0.557301	-0.84347	0.000546719	0.0359468	down	371	665	450	705	1268	641	XP_004020949.1	TBC1D10B		TBC1 domain family, member 10B	0	NM_015527.3	TBC1D10B	TBC1 domain family member 10B
FAM184B	32.1995	74.806	0.430441	-1.21611	0.000553459	0.0362793	down	22	31	42	78	83	58	XP_004009769.1	FAM184B		family with sequence similarity 184, member B	0	NM_015688.1	FAM184B	family with sequence similarity 184, member B
C7H14orf166B	0	8.10801	0	-20	0.000559107	0.0365385	down	0	0	0	4	11	8	XP_004011130.1	C7H14orf166B		chromosome 7 open reading frame, human C14orf166B	0	NM_194287.2	C14orf166B	chromosome 14 open reading frame 166B
MRPS36	298.694	191.628	1.55872	0.640361	0.000564874	0.0367175	up	236	373	300	222	171	155	XP_004016963.1	MRPS36		mitochondrial ribosomal protein S36	7e-52	NM_033281.5	MRPS36	28S ribosomal protein S36, mitochondrial
RBPMS	500.483	324.106	1.54419	0.626854	0.000565714	0.0367175	up	514	643	373	389	393	205	XP_004021805.1	RBPMS		RNA binding protein with multiple splicing	1e-110	NM_006867.3	RBPMS	HCG2043421, isoform CRA_c
ZBTB34	86.4885	139.3	0.620881	-0.687612	0.00059471	0.0381712	down	107	100	54	155	193	84	ZBTB34	ZBTB34		zinc finger and BTB domain containing 34	0	NM_203482.1	ZBTB34	Zinc finger and BTB domain-containing protein 34
ACSL6	170.952	80.9356	2.11219	1.07874	0.000601303	0.0384798	up	163	215	143	71	121	56	XP_004008692.1	ACSL6		acyl-CoA synthetase long-chain family member 6	0	NM_015256.3	ACSL6	cDNA, FLJ95253, highly similar to Homo sapiens acyl-CoA synthetase long-chain family member 6(ACSL6), mRNA
FAM65C	25.0889	69.2057	0.362526	-1.46384	0.000632179	0.040217	down	24	27	24	46	107	55	XP_004014934.1	FAM65C		family with sequence similarity 65, member C	0	NM_080829.2	FAM65C	family with sequence similarity 65, member C
CEBPA	246.361	152.951	1.61072	0.687706	0.000637752	0.0404522	up	227	376	169	160	128	138	XP_004015672.1	CEBPA		CCAAT/enhancer binding protein (C/EBP), alpha	4e-47	NM_004364.4	CEBPA	CCAAT/enhancer-binding protein alpha
LOC101107776	33.8482	12.7251	2.65995	1.4114	0.000644031	0.0406949	up	35	42	26	23	10	6	LOC101107776	LOC101107776		ribosomal protein S15a pseudogene
AMH	11.6148	31.3954	0.369952	-1.43459	0.000662665	0.0416205	down	5	26	8	28	50	20	XP_004009426.1	AMH		Anti-Mullerian hormone	1e-57	NM_000479.3	AMH	Muellerian-inhibiting factor
EVI2B	331.936	189.973	1.74728	0.805109	0.00066389	0.0416205	up	320	459	246	214	278	106	XP_004012533.1	EVI2B		ecotropic viral integration site 2B	3e-156	NM_006495.3	EVI2B	Protein EVI2B
PLXNC1	1593.32	845.707	1.88401	0.913806	0.000672229	0.0420211	up	1768	1916	1146	1162	478	706	XP_004007429.1	PLXNC1		plexin C1	0	NM_005761.2	PLXNC1	cDNA FLJ58722, highly similar to Plexin-C1
HRH2	4.1776	18.7895	0.222336	-2.16918	0.00068182	0.0422322	down	7	6	0	28	22	9	UPI0000087ECB	HRH2		Histamine H2 receptor
AGBL4	9.97859	2.39082	4.17371	2.06133	0.000683439	0.0422322	up	11	5	12	1	0	4	XP_004003586.1	AGBL4		ATP/GTP binding protein-like 4	0	NM_032785.3	AGBL4	ATP/GTP binding protein-like 4
SHROOM2	75.1624	144.215	0.521182	-0.94014	0.000698127	0.0430166	down	49	123	66	116	239	95	XP_004022584.1	SHROOM2		shroom family member 2	0	NM_001649.2	SHROOM2	cDNA FLJ39277 fis, clone OCBBF2010858, highly similar to APICAL-LIKE PROTEIN
PVR	251.501	385.703	0.65206	-0.616924	0.000716506	0.0440233	down	209	269	273	427	513	244	XP_004015781.1	PVR		poliovirus receptor	2e-104	NM_006505.3	PVR	cDNA FLJ75404
DNAJB13	103.137	38.3795	2.68729	1.42615	0.000718704	0.0440328	up	74	173	81	64	16	28	XP_004016361.1	DNAJB13		DnaJ (Hsp40) homolog, subfamily B, member 13	3e-172	NM_153614.2	DNAJB13	DnaJ homolog subfamily B member 13
LOC101112974	73.3661	37.6295	1.9497	0.963249	0.000736178	0.0449757	up	47	116	68	20	77	24	XP_004007492.1	LOC101112974		T-complex protein 1 subunit delta-like	4e-125	NM_006430.3	CCT4	T-complex protein 1 subunit delta
CD72	5.42802	18.3079	0.296486	-1.75397	0.000745865	0.0454388	down	6	2	7	21	31	8	XP_004005329.1	CD72		CD72 molecule	4e-92	NM_001782.2	CD72	B-cell differentiation antigen CD72
PACSIN3	167.411	278.232	0.601697	-0.732891	0.000751065	0.0456267	down	174	169	154	322	363	171	XP_004016495.1	PACSIN3		protein kinase C and casein kinase substrate in neurons 3	0	NM_016223.4	PACSIN3	cDNA FLJ61415, highly similar to Protein kinase C and casein kinase substratein neurons protein 3
ADAMTS17	103.992	197.169	0.527428	-0.922954	0.000757448	0.0458809	down	69	135	114	170	255	157	XP_004018069.1	ADAMTS17		ADAM metallopeptidase with thrombospondin type 1 motif, 17	0	NM_139057.2	ADAMTS17	A disintegrin and metalloproteinase with thrombospondin motifs 17
LOC101108799	90.1249	204.605	0.440482	-1.18285	0.000759504	0.0458809	down	113	70	78	208	362	98	LOC101108799	LOC101108799		uncharacterized LOC101108799
RNF17	6.31208	18.8693	0.334515	-1.57986	0.000792603	0.0476136	down	9	4	5	25	24	10	XP_004012221.1	RNF17		ring finger protein 17	0	NM_031994.1	RNF17	cDNA FLJ61720, highly similar to Homo sapiens ring finger protein 17 (RNF17), mRNA
ST3GAL5	503.938	251.335	2.00504	1.00363	0.000804658	0.0482035	up	368	675	505	235	243	228	XP_004005932.1	ST3GAL5		ST3 beta-galactoside alpha-2,3-sialyltransferase 5	0	NM_003896.3	ST3GAL5	cDNA FLJ55056, highly similar to Homo sapiens ST3 beta-galactoside alpha-2,3-sialyltransferase 5, transcript variant 1, mRNA
GSTA1	2339.58	6878.5	0.34013	-1.55584	0.000811952	0.0482384	down	904	3759	2717	5735	13335	3495	NM_001114766.1	GSTA1		Glutathione S-transferase	9e-106	NM_145740.3	GSTA1	Glutathione S-transferase A1
CCDC36	45.5854	21.1656	2.15375	1.10685	0.000829531	0.0491475	up	36	64	41	5	29	24	XP_004018515.1	CCDC36		coiled-coil domain containing 36	0	NM_178173.3	CCDC36	coiled-coil domain containing 36
LOC101103570	9.99954	2.04526	4.88914	2.28958	0.000832169	0.0491687	up	9	8	12	5	2	0	XP_004010306.1	LOC101103570		IQ domain-containing protein H-like	1e-69	NM_022784.2	IQCH	IQ motif containing H
