# Supplementary material for: Comparative DNA methylome analysis of estrus ewes reveals the complex regulatory pathways of sheep fecundity
Source: Reprod Biol Endocrinol. 2020 Aug 4;18:77. doi: 10.1186/s12958-020-00633-9 (PMC7401212; doi:10.1186/s12958-020-00633-9)
Supplement: Supplementary file 3 — Additional file 3. [file 12958_2020_633_MOESM3_ESM.xls]

## Sheet: Sheet1
GeneID	Style-Expression	Expression in Dorset	Expresion in HanBB	FoldChange	FDR	Gene-Methylation	Type-Methylation	Style-Methylation	reads in Dorset	reads in HanBB	p value	GeneSymbol-Methylation	AccID	Description	E-Value	Blast_AccID	Blast_Symbol	Blast_Description
IKZF1	up	116.4	198.875	1.70855	0.0219839	IKZF1	CDS	Down	66	29	3.41314e-11	XM_004007695.1	XP_004007744.1	IKAROS family zinc finger 1 (Ikaros)	0	NM_006060.4	IKZF1	DNA-binding protein Ikaros
IKZF1	up	116.4	198.875	1.70855	0.0219839	IKZF1	Intron	Down	74	34	2.17904e-11	XM_004007695.1	XP_004007744.1	IKAROS family zinc finger 1 (Ikaros)	0	NM_006060.4	IKZF1	DNA-binding protein Ikaros
ROPN1L	up	54.8699	160.142	2.91858	1.6839e-08	ROPN1L	Intron	Down	62	29	2.30587e-09	XM_004017084.1	XP_004017133.1	rhophilin associated tail protein 1-like	2e-112	NM_031916.4	ROPN1L	Ropporin-1-like protein
GOLPH3L	up	1089.9	1729.79	1.58712	0.0140296	GOLPH3L	CDS	Down	125	52	3.85803e-22	XM_004002460.1	XP_004002509.1	golgi phosphoprotein 3-like	4e-158	NM_018178.5	GOLPH3L	Golgi phosphoprotein 3-like
MED6	up	546.173	823.798	1.50831	0.00254949	MED6	Intron	Down	73	29	2.06034e-14	XM_004011057.1	XP_004011106.1	mediator complex subunit 6	2e-138	NM_005466.3	MED6	Mediator of RNA polymerase II transcription subunit 6
CDS1	up	70.5492	200.277	2.83882	0.012696	CDS1	Intron	Down	97	41	7.06571e-17	XM_004010109.1	XP_004010158.1	CDP-diacylglycerol synthase (phosphatidate cytidylyltransferase) 1	0	NM_001263.3	CDS1	Phosphatidate cytidylyltransferase 1
UGT8	up	18.2348	37.8733	2.07698	0.00369305	UGT8	3-UTR	Down	80	37	3.99745e-12	XM_004009596.1	XP_004009645.1	UDP glycosyltransferase 8	0	NM_003360.3	UGT8	cDNA FLJ52624, highly similar to 2-hydroxyacylsphingosine1-beta-galactosyltransferase (EC 2.4.1.45)
KIAA0825	up	123.63	257.279	2.08104	0.000328885	KIAA0825	5-UTR	Down	69	28	2.06248e-13	XM_004009081.1	XP_004009130.1	KIAA0825 ortholog	7e-160	NM_173665.2	KIAA0825	KIAA0825
LOC101112974	up	37.6295	73.3661	1.9497	0.0449757	LOC101112974	Intron	Down	94	19	2.1083e-36	XM_004007443.1	XP_004007492.1	T-complex protein 1 subunit delta-like	4e-125	NM_006430.3	CCT4	T-complex protein 1 subunit delta
RYR3	down	314.198	132.393	0.421368	0.00253641	RYR3	CDS	Up	50	101	2.25838e-15	XM_004010971.1	XP_004011020.1	ryanodine receptor 3	0	NM_001243996.1	RYR3	Ryanodine receptor 3
RYR3	down	314.198	132.393	0.421368	0.00253641	RYR3	Intron	Up	13	61	1.70672e-25	XM_004010971.1	XP_004011020.1	ryanodine receptor 3	0	NM_001243996.1	RYR3	Ryanodine receptor 3
LRRIQ3	up	67.3114	132.642	1.97057	4.76384e-05	LRRIQ3	Intron	Down	53	26	1.13921e-07	XM_004002083.1	XP_004002132.1	leucine-rich repeats and IQ motif containing 3	0	NM_145258.1	LRRIQ3	leucine-rich repeats and IQ motif containing 3
NXPE2	up	42.3506	86.2043	2.03549	0.012626	NXPE2	Intron	Down	48	17	1.62694e-11	XM_004016039.1	XP_004016088.1	neurexophilin and PC-esterase domain family, member 2	0	NM_182495.5	NXPE2	NXPE family member 2
LAT2	up	61.1933	214.99	3.5133	0.0213961	LAT2	Intron	Down	51	25	2.53226e-07	XM_004010333.1	XP_004010382.1	L-type amino acid transporter subunit LAT2	0	NM_182728.2	SLC7A8	cDNA FLJ37231 fis, clone BRAMY2001068, highly similar to Large neutral amino acids transporter small subunit 2
TMEFF2	up	29.4876	55.6095	1.88586	0.00818818	TMEFF2	Intron	Down	51	19	2.35307e-11	XM_004004778.1	XP_004004827.1	transmembrane protein with EGF-like and two follistatin-like domains 2	0	NM_016192.2	TMEFF2	cDNA, FLJ96422, highly similar to Homo sapiens transmembrane protein with EGF-like and two follistatin-like domains 2 (TMEFF2), mRNA
MGLL	down	599.606	287.879	0.480114	0.00108283	MGLL	CDS	Up	15	49	1.70867e-15	XM_004018711.1	XP_004018760.1	monoglyceride lipase	3e-162	NM_007283.6	MGLL	Monoglyceride lipase
MGLL	down	599.606	287.879	0.480114	0.00108283	MGLL	Intron	Up	25	68	4.15064e-17	XM_004018711.1	XP_004018760.1	monoglyceride lipase	3e-162	NM_007283.6	MGLL	Monoglyceride lipase
AOAH	up	123.611	467.375	3.78103	0.00333537	AOAH	Intron	Down	57	26	2.53625e-09	XM_004007894.1	XP_004007943.1	acyloxyacyl hydrolase (neutrophil)	0	NM_001637.3	AOAH	Acyloxyacyl hydrolase small subunit
FSTL5	down	49.4635	16.4749	0.333071	0.000488158	FSTL5	Intron	Up	27	69	5.55818e-16	XM_004017277.1	XP_004017327.1	follistatin-like 5	0	NM_020116.4	FSTL5	Putative uncharacterized protein DKFZp566D234
FSTL5	down	49.4635	16.4749	0.333071	0.000488158	FSTL5	Intron	Up	17	49	1.75628e-13	XM_004017278.1	XP_004017327.1	follistatin-like 5	0	NM_020116.4	FSTL5	Putative uncharacterized protein DKFZp566D234
YIPF1	up	100.826	171.079	1.69677	0.00108283	YIPF1	Intron	Down	55	4	4.01355e-33	XM_004001997.1	YIPF1	Yip1 domain family, member 1	1e-171	NM_018982.4	YIPF1	Protein YIPF1
YIPF1	up	100.826	171.079	1.69677	0.00108283	YIPF1	3-UTR	Down	55	4	4.01355e-33	XM_004001997.1	YIPF1	Yip1 domain family, member 1	1e-171	NM_018982.4	YIPF1	Protein YIPF1
ADAT2	up	38.6061	78.6397	2.03698	3.08282e-07	ADAT2	Intron	Down	88	21	1.78857e-30	XM_004011387.1	XP_004011436.1	adenosine deaminase, tRNA-specific 2	4e-97	NM_182503.2	ADAT2	tRNA-specific adenosine deaminase 2
AGBL4	up	2.39082	9.97859	4.17371	0.0422322	AGBL4	Intron	Down	83	34	1.86494e-15	XM_004003537.1	XP_004003586.1	ATP/GTP binding protein-like 4	0	NM_032785.3	AGBL4	ATP/GTP binding protein-like 4
TTC8	up	186.524	299.26	1.60441	0.0184691	TTC8	Intron	Down	72	30	3.39089e-13	XM_004011096.1	XP_004011145.1	tetratricopeptide repeat domain 8	0	NM_198310	TTC8	cDNA FLJ36572 fis, clone TRACH2012298, highly similar to Tetratricopeptide repeat protein 8
LRCOL1	up	17.5932	72.3568	4.11277	0.000293585	LRCOL1	CDS	Down	63	31	1.19973e-08	XM_004017549.1	XP_004017598.1	leucine rich colipase-like 1	1e-39	NM_001195520.1	LRCOL1	leucine rich colipase-like 1
LRCOL1	up	17.5932	72.3568	4.11277	0.000293585	LRCOL1	Intron	Down	63	31	1.19973e-08	XM_004017549.1	XP_004017598.1	leucine rich colipase-like 1	1e-39	NM_001195520.1	LRCOL1	leucine rich colipase-like 1
PLB1	down	87.2778	25.8246	0.29589	0.000125737	PLB1	Intron	Up	27	72	1.55208e-17	XM_004007238.1	XP_004007287.1	phospholipase B1	0	NM_153021.4	PLB1	Phospholipase B1, membrane-associated
CDH8	down	82.2945	23.5664	0.286367	0.00560428	CDH8	Intron	Up	25	59	2.30976e-12	XM_004015044.1	XP_004015093.1	cadherin 8, type 2	0	NM_001796.4	CDH8	Cadherin-8
PLXNC1	up	845.707	1593.32	1.88401	0.0420211	PLXNC1	Intron	Down	106	46	1.50153e-17	XM_004007380.1	XP_004007429.1	plexin C1	0	NM_005761.2	PLXNC1	cDNA FLJ58722, highly similar to Plexin-C1
ROS1	up	26.821	134.496	5.01456	0.0124917	ROS1	Intron	Down	75	25	9.91799e-19	XM_004011172.1	XP_004011221.1	c-ros oncogene 1 , receptor tyrosine kinase	0	NM_002944.2	ROS1	Proto-oncogene tyrosine-protein kinase ROS
KCNH1	down	30.5678	5.59845	0.183149	0.000423419	KCNH1	Intron	Up	28	63	3.33307e-12	XM_004013915.1	XP_004013965.1	potassium voltage-gated channel, subfamily H (eag-related), member 1	0	NM_172362.2	KCNH1	Potassium voltage-gated channel subfamily H member 1
KCNH1	down	30.5678	5.59845	0.183149	0.000423419	KCNH1	Intron	Up	27	68	2.26913e-15	XM_004013916.1	XP_004013965.1	potassium voltage-gated channel, subfamily H (eag-related), member 1	0	NM_172362.2	KCNH1	Potassium voltage-gated channel subfamily H member 1
MYH15	down	50.077	19.2675	0.384757	6.1299e-05	MYH15	CDS	Up	35	71	2.58197e-11	XM_004003776.1	XP_004003825.1	myosin, heavy chain 15	0	NM_014981.1	MYH15	cDNA FLJ30874 fis, clone FEBRA2004329, moderately similar to MYOSIN HEAVY CHAIN, CARDIAC MUSCLE ISOFORM
CLIP2	down	1112.75	566.705	0.509282	4.79673e-08	CLIP2	CDS	Up	17	57	3.02569e-18	XM_004021244.1	XP_004021293.1	CAP-GLY domain containing linker protein 2	0	NM_032421.2	CLIP2	Cytoplasmic linker 2
WDFY4	up	440.924	873.618	1.98134	0.00333537	WDFY4	Intron	Down	94	40	2.57355e-16	XM_004021557.1	XP_004021606.1	WDFY family member 4	0	NM_020945.1	WDFY4	WD repeat- and FYVE domain-containing protein 4
DAPP1	up	57.6064	99.1741	1.72158	0.00768699	DAPP1	Intron	Down	47	22	1.8975e-07	XM_004009675.1	XP_004009724.1	dual adaptor of phosphotyrosine and 3-phosphoinositides	6e-160	NM_014395.2	DAPP1	Dual adapter for phosphotyrosine and 3-phosphotyrosine and 3-phosphoinositide
TMEM245	up	552.696	835.452	1.5116	0.0173039	TMEM245	Intron	Down	55	21	6.58612e-12	XM_004005213.1	XP_004005262.1	transmembrane protein 245	0	NM_032012.3	TMEM245	Transmembrane protein 245
RNF175	down	32.8308	10.8525	0.330558	0.00593701	RNF175	CDS	Up	16	69	4.12419e-27	XM_004017515.1	XP_004017564.1	ring finger protein 175	4e-174	NM_173662.2	RNF175	RING finger protein 175
RNF175	down	32.8308	10.8525	0.330558	0.00593701	RNF175	Intron	Up	21	45	2.53866e-08	XM_004017515.1	XP_004017564.1	ring finger protein 175	4e-174	NM_173662.2	RNF175	RING finger protein 175
RBPMS	up	324.106	500.483	1.54419	0.0367175	RBPMS	Intron	Down	69	23	1.62655e-17	XM_004021756.1	XP_004021805.1	RNA binding protein with multiple splicing	1e-110	NM_006867.3	RBPMS	HCG2043421, isoform CRA_c
CNTN4	down	580.709	158.186	0.272401	0.000383701	CNTN4	Intron	Up	20	43	4.21705e-08	XM_004018318.1	XP_004018367.1	contactin 4	0	NM_175613.2	CNTN4	Contactin-4
LOC101118186	down	189.308	101.152	0.534323	0.0142325	LOC101118186	CDS	Up	72	146	6.54449e-22	XM_004009184.1	XP_004009233.1	uncharacterized LOC101118186	1e-58	NM_016270.2	KLF2	Similar to Kruppel-like factor 2 (Lung)
LOC101118186	down	189.308	101.152	0.534323	0.0142325	LOC101118186	Intron	Up	72	146	6.54449e-22	XM_004009184.1	XP_004009233.1	uncharacterized LOC101118186	1e-58	NM_016270.2	KLF2	Similar to Kruppel-like factor 2 (Lung)
TTC26	up	81.2695	146.942	1.80809	3.14731e-10	TTC26	DownStream	Down	53	24	9.53464e-09	XM_004008098.1	XP_004008150.1	tetratricopeptide repeat domain 26	0	NM_024926.3	TTC26	Tetratricopeptide repeat protein 26
TTC26	up	81.2695	146.942	1.80809	3.14731e-10	TTC26	Intron	Down	54	25	1.40345e-08	XM_004008098.1	XP_004008150.1	tetratricopeptide repeat domain 26	0	NM_024926.3	TTC26	Tetratricopeptide repeat protein 26
SNAP25	up	154.647	300.481	1.94302	0.0104434	SNAP25	5-UTR	Down	70	8	1.29936e-36	XM_004014154.1	XP_004014204.1	synaptosomal-associated protein, 25kDa	4e-117	NM_130811.2	SNAP25	Synaptosomal-associated protein 25
SNAP25	up	154.647	300.481	1.94302	0.0104434	SNAP25	Intron	Down	70	8	1.29936e-36	XM_004014154.1	XP_004014204.1	synaptosomal-associated protein, 25kDa	4e-117	NM_130811.2	SNAP25	Synaptosomal-associated protein 25
SNAP25	up	154.647	300.481	1.94302	0.0104434	SNAP25	Intron	Down	62	13	5.72395e-24	XM_004014155.1	XP_004014204.1	synaptosomal-associated protein, 25kDa	4e-117	NM_130811.2	SNAP25	Synaptosomal-associated protein 25
RNF13	up	828.852	1313.37	1.58457	4.57668e-05	RNF13	Intron	Down	105	43	3.4456e-19	XM_004003261.1	XP_004003310.1	ring finger protein 13	0	NM_183384.2	RNF13	Ring finger protein 13, isoform CRA_a
DOCK8	up	761.495	1173.83	1.54148	0.00147135	DOCK8	CDS	Down	117	20	4.6098e-50	XM_004005303.1	XP_004005352.1	dedicator of cytokinesis 8	0	NM_203447.3	DOCK8	cDNA FLJ55533, highly similar to Dedicator of cytokinesis protein 8
DOCK8	up	761.495	1173.83	1.54148	0.00147135	DOCK8	Intron	Down	101	42	4.60271e-18	XM_004005303.1	XP_004005352.1	dedicator of cytokinesis 8	0	NM_203447.3	DOCK8	cDNA FLJ55533, highly similar to Dedicator of cytokinesis protein 8
RMND1	up	171.141	287.043	1.67723	0.0101277	RMND1	Upstream	Down	53	24	9.53464e-09	XM_004011413.1	XP_004011462.1	required for meiotic nuclear division 1 homolog (S. cerevisiae)	0	NM_017909.3	RMND1	Required for meiotic nuclear division protein 1 homolog
BAI3	down	385.287	96.9701	0.251683	3.07539e-05	BAI3	Intron	Up	29	74	3.89256e-17	XM_004011580.1	XP_004011629.1	brain-specific angiogenesis inhibitor 3	0	NM_001704.2	BAI3	cDNA FLJ75576, highly similar to Homo sapiens brain-specific angiogenesis inhibitor 3 (BAI3), mRNA
LOC101117587	up	204.598	453.518	2.21663	0.00140147	LOC101117587	CDS	Down	73	31	6.31497e-13	XM_004010127.1	XP_004010176.1	epididymis-specific alpha-mannosidase-like	0	NM_015274.1	MAN2B2	cDNA FLJ90765 fis, clone THYRO1000584, highly similar to Epididymis-specific alpha-mannosidase (EC 3.2.1.24)
LOC101117587	up	204.598	453.518	2.21663	0.00140147	LOC101117587	DownStream	Down	58	25	2.61121e-10	XM_004010127.1	XP_004010176.1	epididymis-specific alpha-mannosidase-like	0	NM_015274.1	MAN2B2	cDNA FLJ90765 fis, clone THYRO1000584, highly similar to Epididymis-specific alpha-mannosidase (EC 3.2.1.24)
WDR7	up	700.469	1107.17	1.58061	0.0215942	WDR7	Intron	Down	66	31	6.97424e-10	XM_004020564.1	XP_004020614.1	WD repeat domain 7	0	NM_052834.2	WDR7	WD repeat domain 7
WDR7	up	700.469	1107.17	1.58061	0.0215942	WDR7	Intron	Down	56	21	1.63528e-12	XM_004020565.1	XP_004020614.1	WD repeat domain 7	0	NM_052834.2	WDR7	WD repeat domain 7
SLC36A1	up	76.2558	161.707	2.12058	0.0139507	SLC36A1	CDS	Down	45	22	1.42498e-06	XM_004008990.1	XP_004009039.1	solute carrier family 36 (proton/amino acid symporter), member 1	0	NM_078483.2	SLC36A1	Dct1
SLC36A1	up	76.2558	161.707	2.12058	0.0139507	SLC36A1	Intron	Down	66	20	1.24521e-18	XM_004008990.1	XP_004009039.1	solute carrier family 36 (proton/amino acid symporter), member 1	0	NM_078483.2	SLC36A1	Dct1
CCDC36	up	21.1656	45.5854	2.15375	0.0491475	CCDC36	Upstream	Down	54	23	6.11243e-10	XM_004018466.1	XP_004018515.1	coiled-coil domain containing 36	0	NM_178173.3	CCDC36	coiled-coil domain containing 36
DUSP27	down	151.144	53.7227	0.35544	5.0179e-05	DUSP27	Intron	Up	21	54	7.65901e-13	XM_004003734.1	XP_004003783.1	dual specificity phosphatase 27 (putative)	2e-164	NM_001080426.1	DUSP27	Inactive dual specificity phosphatase 27
KRIT1	up	5.23858	25.3716	4.84322	0.00372908	KRIT1	Intron	Down	48	12	1.98432e-16	XM_004007707.1	XP_004007759.1	KRIT1, ankyrin repeat containing	0	NM_194456.1	KRIT1	cDNA FLJ31975 fis, clone NT2RP7008190, highly similar to Krev interaction trapped protein 1
